# Supplementary material for: Analysis of the hierarchical structure of the B. subtilis transcriptional regulatory network
Source: Royal Society of Chemistry journal article supplement (doi:10.1039/c4mb00298a), 2015-01-09
Supplement: c4mb00298a1.pdf [file c4mb00298a1.pdf]

## Supplementary Figures S1-S4

for

### Analysis of the hierarchical structure of the *B. subtilis* transcriptional regulatory network

Santhust Kumar,<sup>a</sup> Michele Vendruscolo,<sup>b</sup> Amit Singh,<sup>c</sup> Dhiraj Kumar,<sup>d</sup> and Areejit Samal<sup>\*ef</sup>

<sup>a</sup> Department of Physics and Astrophysics, University of Delhi, Delhi India

<sup>b</sup> Department of Chemistry, University of Cambridge, Cambridge, UK

<sup>c</sup> Department of Microbiology and Cell Biology, Indian Institute of Science, Bangalore, India

<sup>d</sup> International Centre for Genetic Engineering and Biotechnology, New Delhi, India

<sup>e</sup> The Abdus Salam International Centre for Theoretical Physics, Trieste, Italy

<sup>f</sup> The Institute of Mathematical Sciences, Chennai, India

Email: [asamal@ictp.it](mailto:asamal@ictp.it)

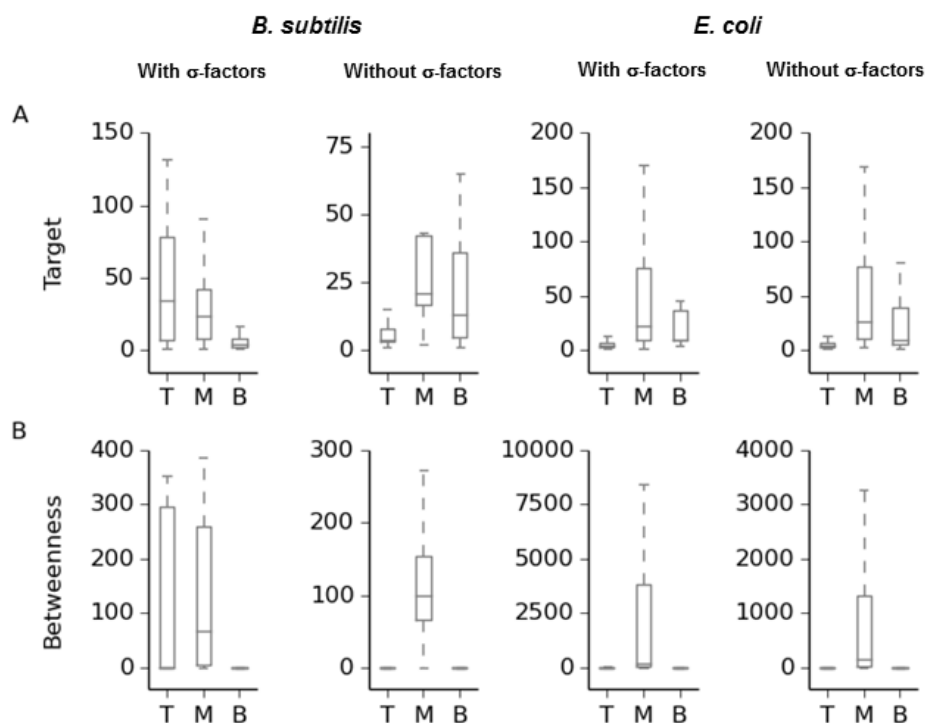

**Supplementary Figure S1: Distribution of number of targets and betweenness centrality of transcriptional regulators in the different levels of hierarchy in the TRNs of *B. subtilis* and *E. coli*.** (A) Number of targets (out-degree) and (B) Betweenness centrality. Box plots show the median and inter quartile range for investigated properties of transcriptional regulators in different levels of hierarchy.

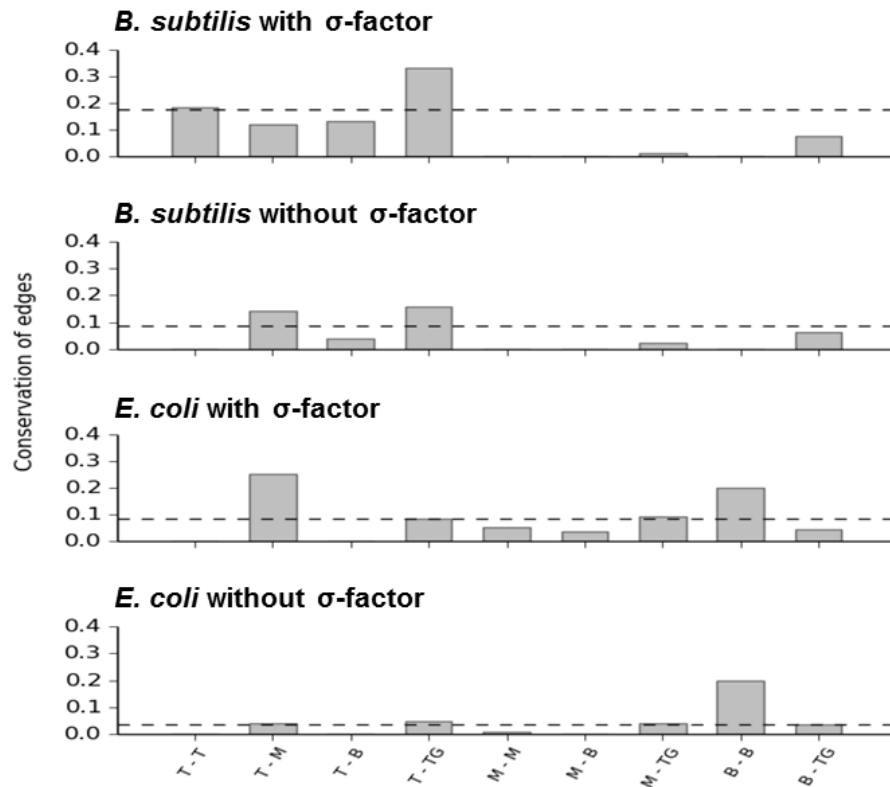

**Supplementary Figure S2: Evolutionary conservation of intra- and inter-level transcriptional interactions of and between different levels of hierarchy in the TRNs of *B. subtilis* and *E. coli*.** The expected values of conservation of transcriptional interactions for randomized networks are shown as dashed black lines.

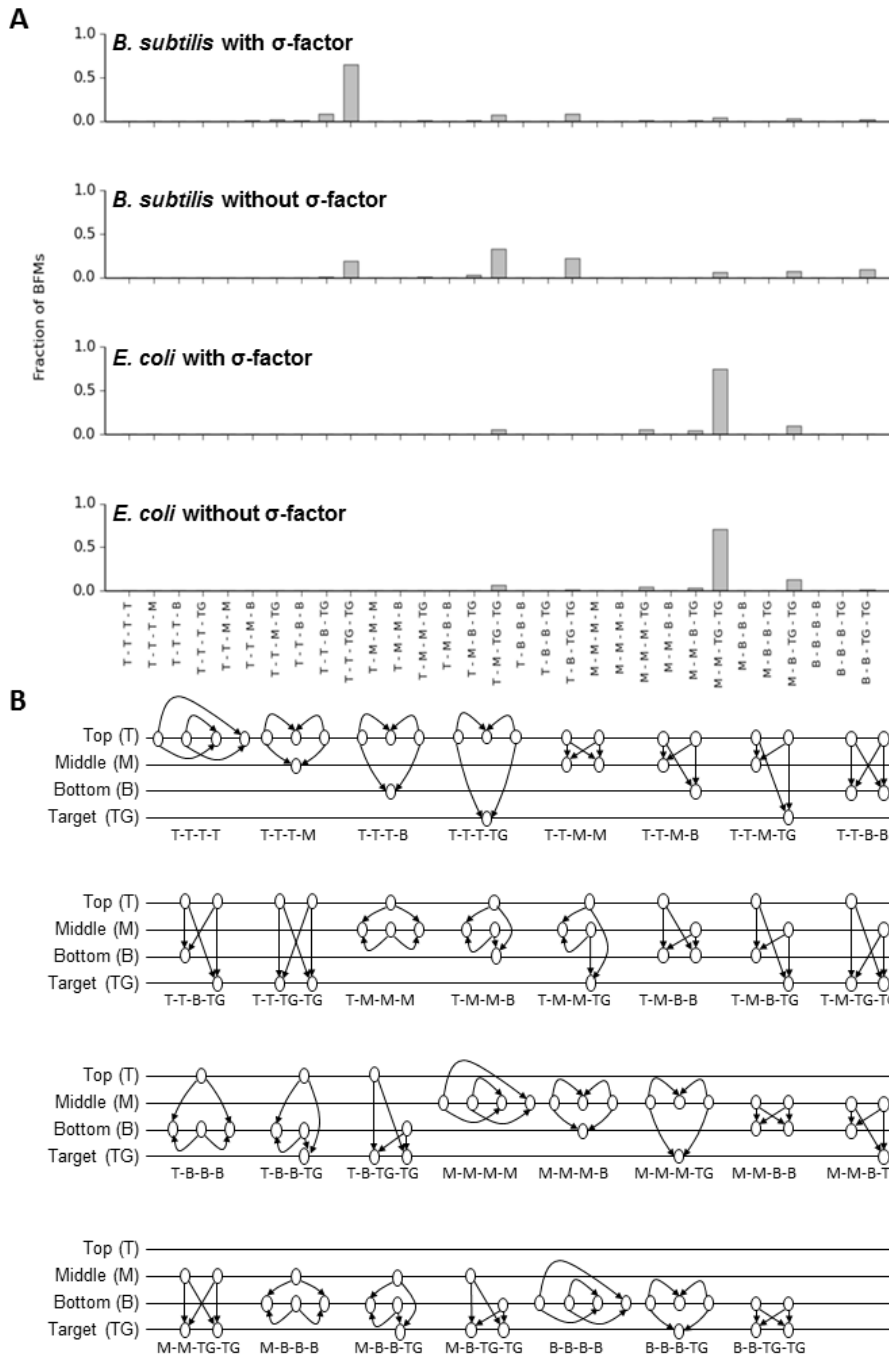

**Supplementary Figure S3: Composition of Bi-fan motifs (BFMs) for genes from different levels of hierarchy in the TRNs of *B. subtilis* and *E. coli*.** Top level regulators appear more often in BFMs in the TRN of *B. subtilis* while Middle level regulators appear more often in BFMs in the TRN of *E. coli*.

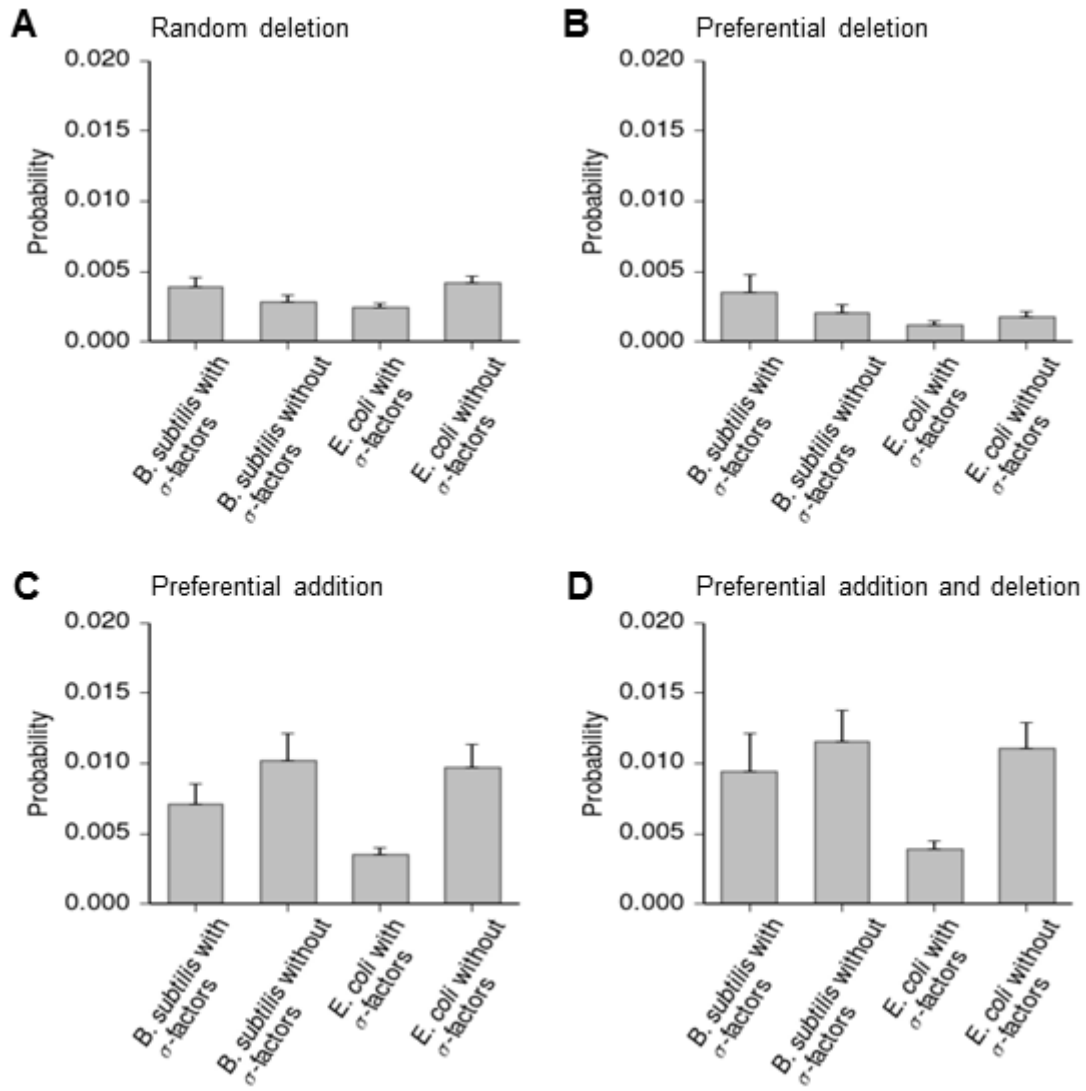

**Supplementary Figure S4: Robustness of the hierarchical decomposition of transcriptional regulatory networks to incomplete information.** The figure shows the probability that the assigned level of a gene in the hierarchical decomposition of the TRNs of *B. subtilis* and *E. coli* changes under 4 different perturbations: (A) Random deletion of 10% of existing edges. (B) Preferential deletion (based on out-degree of the regulatory node) of 10% of existing edges. (C) Preferential addition (based on out-degree of the regulatory node) of new edges equal to 10% of existing edges. (D) Preferential addition of new edges equal to 10% of existing edges and simultaneous preferential deletion of 10% of existing edges.
