# Supplementary material for: Analysis of the hierarchical structure of the B. subtilis transcriptional regulatory network
Source: Royal Society of Chemistry journal article supplement (doi:10.1039/c4mb00298a), 2015-01-09
Supplement: c4mb00298a2.xlsx [file c4mb00298a2.xlsx]

## Sheet: Summary
Supplementary Tables S1-S10 for Analysis of the hierarchical structure of B. subtilis transcriptional regulatory network Santhust Kumara, Michele Vendruscolob, Amit Singhc, Dhiraj Kumard and A. Samalef a Department of Physics and Astrophysics, University of Delhi, Delhi India b Department of Chemistry, University of Cambridge, Cambridge, UK c Department of Microbiology and Cell Biology, Indian In…
Queries regarding datasets shoud be addressed to Areejit Samal (asamal@ictp.it)

## Sheet: Table S1
Table S1: Global structural properties of transcriptional regulatory networks (TRNs) of B. subtilis and E. coli.
Transcriptional Regulatory Network (TRN)		B. subtilis with s factors	B. subtilis without s factors	E. coli with s factors	E. coli without s factors
Number of Nodes	Total	1594	1054	3073	1643
	Transcriptional regulators	140	126	202	195
	TF	126	126	195	195
	s factors	14	0	7	0
	Target genes	1454	928	2871	1448
Number of Edges	With self loops	2976	1478	7977	4155
	Without self loops	2902	1415	7853	4034
Density of Edges		0.013	0.011	0.013	0.013
Clustering coefficient		0.559	0.237	0.64	0.34
Largest strongly connected component (LSCC)	Size of LSCC	6	2	44	13
	Z-score for size of LSCC w.r.t. randomized networks	-3.14	-0.76	-3.05	-4.54
	Perron-Frobenius Eigenvalue associated with LSCC	2.82	2	4.51	3.95
Measures of Hierarchy	Treeness (T)	0.295	0.273	0.2	0.168
	Feedforwardness (F)	0.5	0.91	0.13	0.41
	Orderabitility (O)	0.989	0.99	0.98	0.977
Number of levels in the hierarchy using vertex-sort algorithm	Top-down	6	6	6	10
	Z-score for number of levels in Top-down hierarchy w.r.t. randomized networks	-1.42	-2.16	-1.12	0.43
	Bottom-up	6	6	6	10
	Z-score for number of levels in Bottom-up hierarchy w.r.t. randomized networks	-1.42	-2.16	-1.12	0.43

## Sheet: Table S2
Table S2: Hierarchical decomposition of transcriptional regulatory networks (TRNs) of B. subtilis and E. coli.
		B. subtilis with s factors		B. subtilis without s factors		E. coli with s factors		E. coli without s factors
		Number	Fraction	Number	Fraction	Number	Fraction	Number	Fraction
Nodes	Top	17	0.010665	20	0.0189753	6	0.00195249	22	0.0133901
	Middle	27	0.0169385	9	0.0085389	70	0.022779	45	0.0273889
	Bottom	96	0.0602258	97	0.0920304	126	0.0410023	128	0.0779063
	Target	1454	0.912171	928	0.880455	2871	0.934266	1448	0.881315
Edges	Top to Top	11	0.00379049	0	0	0	0	0	0
	Top to Middle	33	0.0113715	7	0.004947	8	0.00101872	26	0.00644522
	Top to Bottom	68	0.0234321	26	0.0183746	7	0.000891379	21	0.00520575
	Top to Target	1304	0.449345	482	0.340636	145	0.0184643	420	0.104115
	Middle to Middle	26	0.00895934	9	0.00636042	252	0.0320896	125	0.0309866
	Middle to Bottom	19	0.00654721	9	0.00636042	231	0.0294155	104	0.0257809
	Middle to Target	849	0.292557	238	0.168198	6470	0.823889	2580	0.639564
	Bottom to Bottom	2	0.00068918	2	0.00141343	10	0.0012734	10	0.00247893
	Bottom to Target	590	0.203308	642	0.45371	730	0.0929581	748	0.185424

## Sheet: Table S3
Table S3: Composition of Feed forward loops (FFLs) based on genes from different levels of hierarchy in transcriptional regulatory networks (TRNs) of B. subtilis and E. coli.
Composition of FFL (General TF - Specific TF - Target Gene)	B. subtilis with s factors			B. subtilis without s factors			E. coli with s factors			E. coli without s factors
	Number	Fraction	Z-score	Number	Fraction	Z-score	Number	Fraction	Z-score	Number	Fraction	Z-score
Top - Top - Top	1	0.001	31.607	0	0	undefined, 0	0	0	undefined, 0	0	0	undefined, 0
Top -Top - Middle	6	0.006	46.0134	0	0	undefined, 0	0	0	undefined, 0	0	0	-0.06467
Top - Top - Bottom	3	0.003	18.9515	0	0	undefined, 0	0	0	undefined, 0	0	0	-0.03724
Top - Top - Target	85	0.095	27.6545	0	0	-0.07481	0	0	undefined, 0	0	0	-0.06111
Top - Middle - Middle	0	0	-0.92988	1	0.006	-0.04282	2	0	0.09096	1	0	-0.53269
Top - Middle - Bottom	15	0.016	9.9735	0	0	-0.73257	64	0.012	61.5225	0	0	-0.58602
Top - Middle - Target	277	0.31	10.9469	15	0.097	0.28287	0	0	-1.23436	78	0.052	1.00848
Top - Bottom - Bottom	0	0	undefined, 0	0	0	undefined, 0	0	0	undefined, 0	0	0	undefined, 0
Top - Bottom - Target	346	0.38	125.323	90	0.584	35.9718	7	0.001	5.24295	42	0.028	7.31435
Middle - Middle - Middle	1	0.001	-3.86483	2	0.012	0.87618	156	0.032	-3.9447	40	0.026	-2.32095
Middle - Middle - Bottom	0	0	-3.63149	1	0.006	0.39405	109	0.022	-1.4662	16	0.1	-1.33212
Middle - Middle - Target	88	0.098	-5.42037	7	0.045	-1.58985	3615	0.745	-0.69844	931	0.626	1.32565
Middle - Bottom - Bottom	0	0	-0.06151	0	0	undefined, 0	0	0	-0.04432	0	0	-0.06151
Middle - Bottom - Target	63	0.07	-0.20887	38	0.24	14.2044	900	0.185	10.6103	377	0.253	14.0083
Bottom - Bottom - Bottom	0	0	undefined, 0	0	0	undefined, 0	0	0	undefined, 0	0	0	undefined, 0
Bottom - Bottom - Target	0	0	-0.03164	0	0	undefined, 0	0	0	-0.03164	0	0	undefined, 0
Total	893			154			4851			1485

## Sheet: Table S4
Table S4: Composition of Bi-fan motifs (BFMs) based on genes from different levels of hierarchy in transcriptional regulatory networks (TRNs) of B. subtilis and E. coli.
Composition of BFM (General TF - Specific TF - Target Gene)	B. subtilis with s factors			B. subtilis without s factors			E. coli with s factors			E. coli without s factors
	Number	Fraction	Z-score	Number	Fraction	Z-score	Number	Fraction	Z-score	Number	Fraction	Z-score
Top - Top - Top - Top	0	0	undefined, 0	0	0	undefined, 0	0	0	undefined, 0	0	0	undefined, 0
Top - Top - Top - Middle	0	0	undefined, 0	0	0	undefined, 0	0	0	undefined, 0	0	0	undefined, 0
Top - Top - Top - Bottom	0	0	undefined, 0	0	0	undefined, 0	0	0	undefined, 0	0	0	undefined, 0
Top - Top - Top - Target	0	0	undefined, 0	0	0	undefined, 0	0	0	undefined, 0	0	0	undefined, 0
Top - Top - Middle - Middle	0	0	-0.12752	0	0	-0.25376	0	0	-0.10999	3	8.31048e-05	5.14253
Top - Top - Middle - Bottom	7	0.000850134	49.5915	0	0	-0.32601	0	0	-0.10363	0	0	-0.30481
Top - Top - Middle - Target	104	0.0126306	81.4633	0	0	-0.89756	0	0	-0.46893	9	0.000249314	0.58332
Top - Top - Bottom - Bottom	21	0.0025504	192.753	0	0	-0.22454	0	0	-0.06325	0	0	-0.12372
Top - Top - Bottom - Target	689	0.0836774	812.96	10	0.00763359	2.68135	0	0	-0.2037	3	8.31048e-05	0.15012
Top - Top - Target - Target	5343	0.648895	1330.46	249	0.190076	17.9003	39	0.000605882	15.3552	79	0.00218843	0.89066
Top - Middle - Middle - Middle	0	0	-1.01405	0	0	-0.49877	17	0.000264102	0.4343	29	0.000803346	1.85668
Top - Middle - Middle - Bottom	1	0.000121448	-0.80335	0	0	-0.57143	3	4.66063e-05	-1.12546	2	5.54032e-05	-0.83274
Top - Middle - Middle - Target	35	0.00425067	-1.21081	5	0.00381679	-1.15504	192	0.0029828	-1.46826	103	0.00285326	-1.13573
Top - Middle - Bottom - Bottom	1	0.000121448	-0.29228	1	0.000763359	2.40543	1	1.55354e-05	-0.55736	1	2.77016e-05	-0.15903
Top - Middle - Botom - Target	41	0.00497935	-0.70049	35	0.0267176	4.95746	67	0.00104087	-1.20896	40	0.00110806	-0.664
Top - Middle - Target - Target	621	0.075419	-0.97091	426	0.325191	13.4383	3125	0.0485482	0.63687	2228	0.0617192	0.6835
Top - Bottom - Bottom - Bottom	0	0	undefined, 0	0	0	undefined, 0	0	0	undefined, 0	0	0	undefined, 0
Top - Bottom - Bottom - Target	0	0	undefined, 0	0	0	-0.06337	0	0	undefined, 0	0	0	undefined, 0
Top - Bottom - Target - Target	629	0.0763906	111.482	286	0.218321	38.3562	227	0.00352654	57.6121	339	0.00939084	22.278
Middle - Middle - Middle - Middle	0	0	-1.49408	0	0	-0.35349	112	0.00173997	-1.33591	40	0.00110806	-1.50184
Middle - Middle - Middle - Bottom	0	0	-1.75209	0	0	-0.43654	152	0.00236139	-1.00471	80	0.00221613	0.11345
Middle - Middle - Middle - Target	12	0.00145737	-2.5894	0	0	-1.52304	3338	0.0518573	-1.46191	1465	0.0405828	-1.96834
Middle - Middle - Bottom - Bottom	0	0	-1.04484	0	0	-0.26323	51	0.000792307	-0.44317	25	0.00069254	1.02225
Middle - Middle - Bottom - Target	11	0.00133592	-2.01225	0	0	-1.26996	2616	0.0406407	-0.71229	1272	0.0352364	0.95771
Middle - Middle - Target - Target	334	0.0405635	-2.59623	78	0.059542	2.21179	48356	0.751231	-0.43111	25608	0.709383	3.88439
Middle - Bottom - Bottom - Bottom	0	0	-0.06337	0	0	undefined, 0	0	0	undefined, 0	0	0	undefined, 0
Middle - Bottom - Bottom - Target	0	0	-0.09374	0	0	-0.06337	0	0	undefined, 0	0	0	-0.08954
Middle - Bottom - Target - Target	216	0.0262327	0.48282	100	0.0763359	12.1942	5822	0.0904473	21.0935	4523	0.125294	35.5555
Bottom - Bottom - Bottom - Bottom	0	0	undefined, 0	0	0	undefined, 0	0	0	undefined, 0	0	0	undefined, 0
Bottom - Bottom - Bottom - Target	0	0	undefined, 0	0	0	undefined, 0	0	0	undefined, 0	0	0	undefined, 0
Bottom - Bottom - Target - Target	169	0.0205247	137.96	120	0.0916031	89.3899	251	0.00389939	148.385	250	0.0069254	133.454
Total	8234			1310			64369			36099

## Sheet: Table S5
Table S5: Classification of enzyme coding target genes in transcriptional regulatory networks (TRNs) of B. subtilis and E. coli into broad categories of pathways based on Metacyc database.
Category	B. subtilis					E. coli
	Number of pathways	Number of genes in category	Number of genes unique to category	Number of genes unique to category that are in B. subtilis network with s factors	Number of genes unique to category that are in B. subtilis network without s factors	Number of pathways	Number of genes in category	Number of genes unique to category	Number of genes unique to category that are in E.coli network with s factors	Number of genes unique to category that are in E. coli network without s factors
Degradation/Utilization/Assimilation	74	175	156	94	81	74	216	207	186	163
Biosynthesis	93	383	379	146	97	92	546	543	347	204
Generation of Precursor Metabolites and Energy	12	42	33	26	23	10	103	103	92	81
Signal Transduction Pathways	17	35	35	17	16	28	62	62	55	50
Activation/Inactivation/Interconversion	1	4	0	0	0	0	0	0	0	0
Detoxification	3	11	9	5	3	9	25	12	12	9
Total	200	650	612	288	220	211	871	846	692	507

## Sheet: Table S6
Table S6: Regulation of genes coding for enzymes in distinct metabolic subsystems by regulators (transcription factors (TFs) and s-factors) in transcriptional regulatory networks (TRNs) of B. subtilis and E. coli.
Category	B. subtilis				E. coli
	Average number of regulators per target gene				Average number of regulators per target gene
	Transcriptional regulators	Z-score	TF	s factors	Transcriptional regulators	Z-score	TF	s factors
Degradation/Utilization/Assimilation	2.51	6.106	1.75	1.1	3.53	7.124	2.79	1.22
Biosynthesis	1.88	-0.093	1.46	1.03	2.43	-1.329	2.23	1.2
Generation of Precursor Metabolites and Energy	2.34	2.302	1.65	1.04	5.04	12.618	4.24	1.33

## Sheet: Table S7
Table S7: Regulatory interactions in transcriptional regulatory network (TRN) of B. subtilis with s-factors.
Source	Target
BSU00010	BSU00010
BSU00010	BSU00020
BSU00010	BSU25690
BSU00370	BSU00370
BSU00370	BSU00490
BSU00370	BSU00980
BSU00370	BSU01730
BSU00370	BSU01740
BSU00370	BSU01910
BSU00370	BSU01920
BSU00370	BSU01935
BSU00370	BSU01950
BSU00370	BSU01960
BSU00370	BSU01970
BSU00370	BSU01980
BSU00370	BSU03960
BSU00370	BSU08810
BSU00370	BSU09990
BSU00370	BSU10300
BSU00370	BSU10420
BSU00370	BSU11190
BSU00370	BSU11200
BSU00370	BSU11210
BSU00370	BSU11220
BSU00370	BSU11230
BSU00370	BSU11240
BSU00370	BSU11250
BSU00370	BSU12920
BSU00370	BSU12930
BSU00370	BSU12940
BSU00370	BSU12950
BSU00370	BSU12960
BSU00370	BSU13640
BSU00370	BSU14240
BSU00370	BSU14340
BSU00370	BSU14350
BSU00370	BSU14360
BSU00370	BSU14370
BSU00370	BSU15280
BSU00370	BSU15290
BSU00370	BSU18000
BSU00370	BSU18780
BSU00370	BSU19210
BSU00370	BSU24600
BSU00370	BSU24610
BSU00370	BSU27160
BSU00370	BSU27170
BSU00370	BSU31450
BSU00370	BSU31460
BSU00370	BSU33120
BSU00370	BSU33750
BSU00370	BSU33760
BSU00370	BSU33770
BSU00370	BSU33780
BSU00370	BSU33790
BSU00370	BSU34430
BSU00370	BSU34440
BSU00370	BSU35100
BSU00370	BSU35110
BSU00370	BSU35120
BSU00370	BSU35130
BSU00370	BSU35910
BSU00370	BSU35920
BSU00370	BSU35930
BSU00370	BSU35940
BSU00370	BSU35950
BSU00370	BSU35960
BSU00370	BSU37350
BSU00370	BSU37360
BSU00370	BSU37370
BSU00370	BSU37380
BSU00370	BSU37390
BSU00370	BSU37400
BSU00370	BSU37410
BSU00370	BSU37420
BSU00370	BSU37430
BSU00370	BSU38790
BSU00370	BSU39340
BSU00370	BSU39350
BSU00370	BSU39360
BSU00370	BSU39370
BSU00370	BSU39380
BSU00370	BSU39390
BSU00370	BSU39890
BSU00370	BSU39870
BSU00370	BSU39880
BSU00370	BSU39900
BSU00370	BSU39910
BSU00370	BSU39920
BSU00370	BSU39930
BSU00470	BSU00470
BSU00470	BSU00480
BSU00470	BSU06370
BSU00470	BSU06420
BSU00470	BSU06430
BSU00470	BSU06440
BSU00470	BSU06450
BSU00470	BSU06460
BSU00470	BSU06470
BSU00470	BSU06480
BSU00470	BSU06490
BSU00470	BSU06500
BSU00470	BSU06510
BSU00470	BSU06520
BSU00470	BSU06530
BSU00470	BSU15470
BSU00470	BSU15480
BSU00470	BSU15490
BSU00470	BSU15500
BSU00470	BSU15510
BSU00470	BSU15520
BSU00470	BSU15530
BSU00470	BSU15540
BSU00470	BSU15550
BSU00470	BSU15560
BSU00470	BSU22060
BSU00470	BSU22070
BSU00470	BSU24310
BSU00470	BSU24320
BSU00470	BSU29990
BSU00470	BSU32130
BSU00470	BSU36900
BSU00470	BSU40420
BSU00560	BSU00560
BSU00560	BSU02080
BSU00560	BSU01550
BSU00560	BSU02070
BSU00560	BSU03700
BSU00560	BSU03710
BSU00560	BSU03720
BSU00560	BSU03920
BSU00560	BSU03930
BSU00560	BSU08660
BSU00560	BSU09750
BSU00560	BSU13470
BSU00560	BSU15330
BSU00560	BSU23380
BSU00560	BSU23390
BSU00560	BSU23401
BSU00560	BSU23410
BSU00560	BSU23420
BSU00560	BSU23430
BSU00560	BSU23440
BSU00560	BSU23450
BSU00560	BSU23460
BSU00560	BSU23470
BSU00560	BSU23480
BSU00560	BSU24230
BSU00560	BSU25540
BSU00560	BSU27750
BSU00560	BSU29570
BSU00560	BSU33050
BSU00560	BSU33060
BSU00560	BSU33070
BSU00560	BSU35800
BSU00560	BSU35810
BSU00560	BSU35820
BSU00830	BSU00830
BSU00830	BSU00840
BSU00830	BSU00850
BSU00830	BSU00860
BSU00830	BSU00870
BSU00830	BSU00880
BSU00830	BSU13700
BSU00830	BSU28190
BSU00830	BSU28200
BSU00830	BSU28220
BSU00830	BSU28500
BSU00830	BSU34540
BSU00980	BSU00490
BSU00980	BSU03780
BSU00980	BSU05020
BSU00980	BSU08760
BSU00980	BSU09420
BSU00980	BSU13990
BSU00980	BSU15280
BSU00980	BSU15290
BSU00980	BSU16980
BSU00980	BSU18350
BSU00980	BSU18360
BSU00980	BSU18920
BSU00980	BSU22790
BSU00980	BSU23450
BSU00980	BSU23460
BSU00980	BSU23470
BSU00980	BSU24220
BSU00980	BSU25200
BSU00980	BSU25210
BSU00980	BSU25840
BSU00980	BSU27990
BSU00980	BSU28000
BSU00980	BSU29760
BSU00980	BSU29770
BSU00980	BSU29780
BSU00980	BSU33040
BSU00980	BSU35310
BSU00980	BSU36640
BSU00980	BSU36650
BSU00980	BSU36660
BSU00980	BSU37030
BSU00980	BSU37130
BSU00980	BSU37470
BSU00980	BSU40310
BSU01540	BSU09990
BSU01730	BSU00250
BSU01730	BSU00260
BSU01730	BSU00620
BSU01730	BSU00630
BSU01730	BSU01730
BSU01730	BSU01740
BSU01730	BSU02310
BSU01730	BSU02890
BSU01730	BSU02900
BSU01730	BSU02910
BSU01730	BSU02920
BSU01730	BSU02930
BSU01730	BSU02940
BSU01730	BSU04590
BSU01730	BSU04600
BSU01730	BSU06190
BSU01730	BSU06200
BSU01730	BSU06210
BSU01730	BSU06270
BSU01730	BSU06280
BSU01730	BSU06290
BSU01730	BSU08580
BSU01730	BSU08590
BSU01730	BSU11490
BSU01730	BSU11500
BSU01730	BSU12420
BSU01730	BSU14340
BSU01730	BSU14350
BSU01730	BSU14360
BSU01730	BSU14370
BSU01730	BSU14480
BSU01730	BSU16950
BSU01730	BSU17840
BSU01730	BSU18340
BSU01730	BSU18580
BSU01730	BSU18590
BSU01730	BSU18980
BSU01730	BSU19290
BSU01730	BSU23830
BSU01730	BSU25370
BSU01730	BSU25380
BSU01730	BSU25390
BSU01730	BSU27180
BSU01730	BSU28830
BSU01730	BSU29520
BSU01730	BSU29530
BSU01730	BSU30000
BSU01730	BSU30010
BSU01730	BSU31000
BSU01730	BSU31010
BSU01730	BSU31020
BSU01730	BSU34430
BSU01730	BSU34440
BSU01730	BSU35100
BSU01730	BSU35110
BSU01730	BSU35120
BSU01730	BSU35130
BSU01730	BSU36090
BSU01730	BSU36540
BSU01730	BSU38260
BSU01730	BSU38480
BSU01730	BSU38790
BSU01730	BSU38940
BSU01810	BSU01800
BSU01810	BSU01810
BSU01810	BSU01820
BSU02440	BSU02420
BSU02440	BSU02430
BSU02680	BSU02670
BSU02680	BSU02680
BSU02680	BSU39970
BSU02680	BSU39980
BSU03470	BSU03450
BSU03470	BSU03460
BSU03890	BSU03890
BSU03890	BSU03900
BSU03890	BSU03910
BSU04100	BSU04050
BSU04100	BSU04060
BSU04100	BSU04070
BSU04100	BSU04080
BSU04100	BSU04090
BSU04100	BSU04100
BSU04100	BSU04110
BSU04250	BSU04250
BSU04460	BSU04470
BSU04730	BSU00520
BSU04730	BSU00830
BSU04730	BSU00840
BSU04730	BSU00850
BSU04730	BSU00860
BSU04730	BSU00870
BSU04730	BSU00880
BSU04730	BSU00890
BSU04730	BSU00900
BSU04730	BSU00910
BSU04730	BSU03130
BSU04730	BSU03910
BSU04730	BSU04190
BSU04730	BSU04200
BSU04730	BSU04210
BSU04730	BSU04220
BSU04730	BSU04340
BSU04730	BSU04370
BSU04730	BSU04380
BSU04730	BSU04400
BSU04730	BSU04430
BSU04730	BSU04550
BSU04730	BSU04710
BSU04730	BSU04720
BSU04730	BSU04730
BSU04730	BSU04740
BSU04730	BSU05490
BSU04730	BSU05790
BSU04730	BSU06660
BSU04730	BSU07750
BSU04730	BSU07880
BSU04730	BSU07890
BSU04730	BSU07900
BSU04730	BSU08570
BSU04730	BSU08580
BSU04730	BSU08590
BSU04730	BSU08600
BSU04730	BSU09450
BSU04730	BSU09530
BSU04730	BSU09540
BSU04730	BSU09690
BSU04730	BSU11490
BSU04730	BSU11500
BSU04730	BSU12150
BSU04730	BSU13010
BSU04730	BSU13020
BSU04730	BSU13160
BSU04730	BSU18350
BSU04730	BSU18360
BSU04730	BSU18510
BSU04730	BSU18520
BSU04730	BSU18530
BSU04730	BSU19240
BSU04730	BSU19850
BSU04730	BSU23340
BSU04730	BSU24000
BSU04730	BSU24010
BSU04730	BSU24020
BSU04730	BSU24490
BSU04730	BSU24500
BSU04730	BSU24740
BSU04730	BSU24760
BSU04730	BSU24770
BSU04730	BSU25200
BSU04730	BSU25210
BSU04730	BSU25230
BSU04730	BSU25290
BSU04730	BSU25300
BSU04730	BSU27590
BSU04730	BSU27600
BSU04730	BSU27630
BSU04730	BSU27750
BSU04730	BSU27760
BSU04730	BSU28340
BSU04730	BSU28500
BSU04730	BSU29100
BSU04730	BSU29110
BSU04730	BSU29410
BSU04730	BSU29760
BSU04730	BSU29770
BSU04730	BSU29780
BSU04730	BSU30650
BSU04730	BSU33200
BSU04730	BSU33410
BSU04730	BSU34540
BSU04730	BSU35180
BSU04730	BSU35310
BSU04730	BSU35670
BSU04730	BSU35830
BSU04730	BSU36670
BSU04730	BSU36720
BSU04730	BSU37210
BSU04730	BSU38430
BSU04730	BSU38630
BSU04730	BSU38720
BSU04730	BSU38830
BSU04730	BSU39040
BSU04730	BSU39050
BSU04730	BSU39810
BSU04730	BSU40450
BSU05050	BSU36900
BSU05060	BSU36900
BSU05420	BSU05430
BSU05970	BSU03050
BSU05970	BSU03060
BSU05970	BSU36000
BSU05970	BSU36010
BSU05970	BSU38060
BSU05970	BSU38730
BSU05970	BSU38740
BSU05970	BSU38750
BSU05970	BSU38760
BSU06140	BSU06150
BSU06140	BSU06160
BSU07590	BSU07610
BSU07590	BSU07620
BSU07820	BSU07800
BSU07820	BSU07810
BSU07820	BSU07820
BSU08100	BSU08060
BSU08100	BSU08070
BSU08100	BSU08080
BSU08100	BSU08090
BSU08190	BSU08180
BSU08190	BSU08190
BSU08190	BSU08200
BSU08620	BSU08620
BSU08620	BSU08630
BSU08620	BSU08650
BSU08620	BSU08660
BSU08730	BSU03480
BSU08730	BSU03490
BSU08730	BSU03500
BSU08730	BSU03510
BSU08730	BSU03520
BSU08730	BSU08730
BSU08730	BSU08820
BSU08730	BSU11500
BSU08730	BSU13850
BSU08730	BSU23520
BSU08730	BSU28120
BSU08730	BSU28130
BSU08730	BSU28140
BSU08730	BSU28150
BSU08730	BSU28160
BSU08730	BSU28170
BSU08730	BSU32990
BSU08730	BSU40090
BSU08730	BSU40100
BSU08810	BSU08810
BSU08810	BSU09990
BSU09270	BSU02130
BSU09270	BSU02140
BSU09270	BSU09280
BSU09270	BSU09290
BSU09270	BSU09300
BSU09380	BSU03280
BSU09380	BSU03290
BSU09380	BSU03300
BSU09380	BSU13040
BSU09380	BSU37310
BSU09430	BSU09440
BSU09520	BSU09500
BSU09520	BSU09510
BSU09520	BSU09520
BSU09520	BSU11500
BSU09520	BSU23830
BSU09520	BSU27020
BSU09520	BSU27160
BSU09520	BSU28040
BSU09520	BSU36530
BSU09990	BSU03670
BSU09990	BSU10300
BSU09990	BSU11360
BSU09990	BSU11370
BSU09990	BSU11380
BSU09990	BSU11390
BSU09990	BSU11400
BSU09990	BSU11430
BSU09990	BSU11440
BSU09990	BSU11450
BSU09990	BSU11460
BSU09990	BSU11470
BSU09990	BSU14700
BSU09990	BSU24280
BSU09990	BSU24600
BSU09990	BSU24610
BSU09990	BSU38400
BSU10420	BSU02010
BSU10420	BSU03420
BSU10420	BSU03430
BSU10420	BSU06830
BSU10420	BSU09050
BSU10420	BSU09060
BSU10420	BSU09070
BSU10420	BSU09080
BSU10420	BSU09090
BSU10420	BSU09100
BSU10420	BSU10420
BSU10420	BSU10450
BSU10420	BSU10620
BSU10420	BSU10630
BSU10420	BSU10640
BSU10420	BSU10650
BSU10420	BSU10660
BSU10420	BSU14240
BSU10420	BSU40900
BSU10420	BSU16110
BSU10420	BSU16940
BSU10420	BSU17860
BSU10420	BSU17870
BSU10420	BSU17880
BSU10420	BSU21940
BSU10420	BSU24660
BSU10420	BSU24670
BSU10420	BSU24680
BSU10420	BSU24690
BSU10420	BSU24700
BSU10420	BSU24710
BSU10420	BSU24720
BSU10420	BSU24730
BSU10420	BSU25570
BSU10420	BSU25580
BSU10420	BSU25590
BSU10420	BSU28040
BSU10420	BSU28070
BSU10420	BSU33260
BSU10420	BSU33270
BSU10420	BSU33280
BSU10420	BSU33470
BSU10420	BSU33480
BSU10420	BSU35400
BSU10420	BSU35410
BSU10420	BSU35420
BSU10420	BSU35430
BSU10420	BSU35440
BSU10420	BSU35450
BSU10420	BSU35460
BSU10420	BSU35470
BSU10420	BSU36300
BSU10420	BSU36310
BSU10420	BSU40890
BSU10420	BSU40910
BSU10420	BSU40920
BSU10420	BSU40990
BSU10420	BSU41000
BSU10420	BSU41010
BSU10420	BSU41020
BSU10560	BSU10550
BSU11130	BSU24280
BSU11300	BSU10420
BSU11310	BSU24660
BSU11310	BSU24670
BSU11310	BSU24680
BSU11310	BSU24690
BSU11310	BSU24700
BSU11310	BSU24710
BSU11310	BSU24720
BSU11310	BSU24730
BSU11500	BSU08830
BSU11500	BSU08840
BSU11500	BSU08850
BSU11500	BSU08860
BSU11500	BSU08870
BSU11500	BSU14730
BSU11500	BSU14740
BSU11500	BSU29280
BSU11500	BSU29290
BSU11500	BSU29300
BSU11500	BSU29310
BSU11500	BSU29320
BSU11500	BSU29330
BSU11500	BSU29340
BSU11500	BSU29350
BSU11500	BSU29360
BSU11500	BSU29370
BSU11500	BSU29380
BSU11500	BSU29390
BSU11500	BSU29400
BSU11500	BSU39460
BSU11500	BSU39470
BSU11500	BSU39480
BSU11500	BSU39490
BSU11500	BSU39500
BSU11500	BSU39510
BSU11650	BSU09410
BSU11650	BSU10300
BSU11650	BSU14700
BSU11650	BSU34450
BSU11650	BSU34460
BSU11650	BSU34470
BSU11660	BSU11650
BSU11660	BSU11660
BSU11660	BSU11670
BSU11660	BSU11680
BSU11660	BSU11690
BSU11660	BSU11700
BSU11660	BSU11710
BSU12370	BSU12300
BSU12370	BSU12310
BSU12370	BSU12320
BSU12370	BSU12330
BSU12370	BSU12340
BSU12370	BSU12350
BSU12370	BSU12360
BSU12370	BSU12370
BSU12370	BSU12380
BSU12370	BSU12390
BSU12510	BSU12510
BSU12510	BSU12520
BSU12510	BSU12530
BSU12510	BSU12540
BSU12510	BSU12550
BSU12560	BSU12570
BSU12560	BSU12580
BSU12560	BSU12590
BSU12560	BSU12600
BSU12560	BSU12610
BSU12560	BSU12620
BSU12560	BSU12630
BSU12560	BSU12640
BSU12560	BSU12650
BSU12560	BSU12660
BSU12900	BSU12900
BSU13150	BSU13140
BSU13310	BSU02690
BSU13310	BSU03280
BSU13310	BSU03290
BSU13310	BSU03300
BSU13310	BSU03310
BSU13310	BSU03320
BSU13310	BSU03330
BSU13310	BSU04050
BSU13310	BSU04060
BSU13310	BSU04070
BSU13310	BSU04080
BSU13310	BSU04090
BSU13310	BSU04100
BSU13310	BSU04110
BSU13310	BSU06310
BSU13310	BSU07560
BSU13310	BSU11430
BSU13310	BSU11440
BSU13310	BSU11450
BSU13310	BSU11460
BSU13310	BSU11470
BSU13310	BSU13310
BSU13310	BSU13320
BSU13310	BSU13330
BSU13310	BSU17450
BSU13310	BSU17460
BSU13310	BSU18000
BSU13310	BSU18120
BSU13310	BSU18440
BSU13310	BSU18450
BSU13310	BSU19580
BSU13310	BSU24030
BSU13310	BSU24040
BSU13310	BSU24050
BSU13310	BSU24060
BSU13310	BSU24070
BSU13310	BSU24080
BSU13310	BSU24090
BSU13310	BSU27430
BSU13310	BSU27440
BSU13310	BSU27450
BSU13310	BSU27460
BSU13310	BSU28250
BSU13310	BSU28260
BSU13310	BSU28270
BSU13310	BSU28280
BSU13310	BSU28290
BSU13310	BSU28300
BSU13310	BSU28310
BSU13310	BSU30360
BSU13310	BSU32430
BSU13310	BSU32440
BSU13310	BSU32450
BSU13310	BSU32460
BSU13310	BSU36100
BSU13310	BSU36510
BSU13310	BSU36520
BSU13310	BSU36910
BSU13310	BSU36920
BSU13310	BSU37930
BSU13310	BSU37940
BSU13310	BSU37950
BSU13310	BSU38850
BSU13310	BSU40470
BSU13310	BSU40480
BSU13450	BSU13450
BSU13450	BSU13460
BSU13880	BSU13890
BSU13880	BSU13900
BSU13880	BSU13910
BSU13920	BSU13920
BSU13920	BSU13930
BSU14140	BSU14140
BSU14140	BSU18000
BSU14140	BSU29120
BSU14140	BSU29130
BSU14140	BSU29140
BSU14240	BSU10420
BSU14240	BSU11920
BSU14240	BSU14240
BSU14240	BSU21440
BSU14240	BSU21450
BSU14240	BSU21460
BSU14240	BSU21470
BSU14240	BSU21480
BSU14240	BSU33750
BSU14240	BSU33760
BSU14240	BSU33770
BSU14240	BSU37350
BSU14240	BSU37360
BSU14240	BSU37370
BSU14240	BSU37380
BSU14240	BSU37390
BSU14240	BSU37400
BSU14240	BSU37410
BSU14240	BSU37420
BSU14240	BSU37430
BSU14240	BSU39940
BSU14240	BSU39950
BSU14240	BSU40140
BSU14240	BSU40150
BSU14240	BSU40160
BSU14240	BSU40580
BSU14240	BSU40590
BSU14240	BSU40600
BSU14240	BSU40610
BSU14240	BSU40620
BSU14380	BSU14380
BSU14380	BSU14390
BSU14380	BSU14400
BSU14730	BSU14710
BSU14730	BSU14720
BSU14730	BSU14730
BSU14730	BSU14740
BSU15090	BSU11740
BSU15090	BSU11750
BSU15090	BSU19780
BSU15090	BSU19790
BSU15090	BSU23530
BSU15090	BSU24360
BSU15090	BSU24370
BSU15090	BSU24380
BSU15090	BSU24390
BSU15090	BSU24400
BSU15090	BSU24410
BSU15090	BSU24420
BSU15090	BSU24430
BSU15090	BSU24440
BSU15090	BSU25520
BSU15090	BSU25530
BSU15090	BSU36070
BSU15320	BSU00160
BSU15320	BSU00230
BSU15320	BSU00600
BSU15320	BSU00610
BSU15320	BSU00620
BSU15320	BSU00630
BSU15320	BSU01530
BSU15320	BSU01570
BSU15320	BSU02600
BSU15320	BSU03090
BSU15320	BSU03100
BSU15320	BSU04610
BSU15320	BSU04630
BSU15320	BSU05710
BSU15320	BSU05730
BSU15320	BSU05740
BSU15320	BSU06890
BSU15320	BSU06900
BSU15320	BSU06910
BSU15320	BSU06920
BSU15320	BSU06930
BSU15320	BSU07300
BSU15320	BSU07310
BSU15320	BSU08640
BSU15320	BSU08970
BSU15320	BSU08980
BSU15320	BSU09165
BSU15320	BSU09400
BSU15320	BSU09770
BSU15320	BSU09780
BSU15320	BSU09830
BSU15320	BSU10400
BSU15320	BSU10610
BSU15320	BSU10790
BSU15320	BSU10940
BSU15320	BSU10950
BSU15320	BSU11510
BSU15320	BSU11730
BSU15320	BSU11790
BSU15320	BSU12050
BSU15320	BSU12110
BSU15320	BSU12320
BSU15320	BSU12330
BSU15320	BSU12340
BSU15320	BSU12350
BSU15320	BSU12360
BSU15320	BSU12370
BSU15320	BSU12380
BSU15320	BSU12390
BSU15320	BSU13710
BSU15320	BSU13830
BSU15320	BSU13840
BSU15320	BSU14250
BSU15320	BSU14870
BSU15320	BSU15030
BSU15320	BSU15090
BSU15320	BSU15170
BSU15320	BSU15210
BSU15320	BSU15220
BSU15320	BSU15230
BSU15320	BSU15240
BSU15320	BSU15250
BSU15320	BSU15260
BSU15320	BSU15270
BSU15320	BSU15650
BSU15320	BSU15810
BSU15320	BSU17030
BSU15320	BSU17420
BSU15320	BSU17640
BSU15320	BSU17720
BSU15320	BSU18210
BSU15320	BSU18220
BSU15320	BSU18230
BSU15320	BSU18240
BSU15320	BSU18250
BSU15320	BSU18260
BSU15320	BSU18780
BSU15320	BSU22240
BSU15320	BSU22520
BSU15320	BSU22800
BSU15320	BSU23170
BSU15320	BSU23180
BSU15320	BSU23190
BSU15320	BSU23530
BSU15320	BSU24120
BSU15320	BSU24130
BSU15320	BSU24140
BSU15320	BSU24150
BSU15320	BSU24160
BSU15320	BSU24170
BSU15320	BSU24360
BSU15320	BSU24370
BSU15320	BSU24380
BSU15320	BSU24390
BSU15320	BSU24400
BSU15320	BSU24410
BSU15320	BSU24420
BSU15320	BSU24430
BSU15320	BSU25060
BSU15320	BSU25070
BSU15320	BSU25350
BSU15320	BSU25360
BSU15320	BSU25520
BSU15320	BSU25530
BSU15320	BSU25750
BSU15320	BSU25770
BSU15320	BSU26390
BSU15320	BSU27300
BSU15320	BSU27310
BSU15320	BSU27670
BSU15320	BSU27830
BSU15320	BSU27840
BSU15320	BSU27970
BSU15320	BSU27980
BSU15320	BSU28100
BSU15320	BSU28110
BSU15320	BSU28320
BSU15320	BSU28380
BSU15320	BSU28960
BSU15320	BSU29100
BSU15320	BSU29110
BSU15320	BSU29160
BSU15320	BSU29239
BSU15320	BSU29240
BSU15320	BSU30080
BSU15320	BSU30940
BSU15320	BSU30950
BSU15320	BSU30960
BSU15320	BSU30970
BSU15320	BSU30980
BSU15320	BSU31730
BSU15320	BSU32350
BSU15320	BSU33470
BSU15320	BSU33480
BSU15320	BSU35240
BSU15320	BSU36390
BSU15320	BSU36400
BSU15320	BSU36410
BSU15320	BSU36420
BSU15320	BSU36430
BSU15320	BSU36750
BSU15320	BSU37920
BSU15320	BSU38970
BSU15320	BSU38980
BSU15320	BSU38990
BSU15320	BSU39000
BSU15320	BSU40630
BSU15320	BSU40940
BSU15330	BSU00450
BSU15330	BSU00560
BSU15330	BSU01520
BSU15330	BSU02080
BSU15330	BSU01530
BSU15330	BSU01550
BSU15330	BSU02070
BSU15330	BSU03400
BSU15330	BSU03700
BSU15330	BSU03710
BSU15330	BSU03720
BSU15330	BSU03920
BSU15330	BSU03930
BSU15330	BSU05530
BSU15330	BSU05540
BSU15330	BSU07930
BSU15330	BSU07980
BSU15330	BSU08110
BSU15330	BSU08550
BSU15330	BSU08660
BSU15330	BSU09150
BSU15330	BSU09180
BSU15330	BSU09230
BSU15330	BSU09750
BSU15330	BSU10900
BSU15330	BSU10970
BSU15330	BSU10980
BSU15330	BSU13470
BSU15330	BSU13840
BSU15330	BSU13920
BSU15330	BSU13930
BSU15330	BSU14800
BSU15330	BSU15330
BSU15330	BSU17750
BSU15330	BSU17760
BSU15330	BSU17770
BSU15330	BSU17980
BSU15330	BSU17990
BSU15330	BSU18020
BSU15330	BSU18030
BSU15330	BSU18600
BSU15330	BSU18720
BSU15330	BSU19950
BSU15330	BSU21950
BSU15330	BSU22000
BSU15330	BSU22290
BSU15330	BSU22920
BSU15330	BSU22930
BSU15330	BSU23380
BSU15330	BSU23390
BSU15330	BSU23401
BSU15330	BSU23410
BSU15330	BSU23420
BSU15330	BSU23430
BSU15330	BSU23440
BSU15330	BSU23450
BSU15330	BSU23460
BSU15330	BSU23470
BSU15330	BSU23480
BSU15330	BSU24230
BSU15330	BSU25110
BSU15330	BSU25130
BSU15330	BSU25540
BSU15330	BSU26950
BSU15330	BSU26960
BSU15330	BSU26970
BSU15330	BSU26980
BSU15330	BSU26990
BSU15330	BSU27470
BSU15330	BSU27750
BSU15330	BSU28660
BSU15330	BSU29570
BSU15330	BSU30840
BSU15330	BSU31380
BSU15330	BSU33050
BSU15330	BSU33060
BSU15330	BSU33070
BSU15330	BSU33340
BSU15330	BSU33540
BSU15330	BSU34470
BSU15330	BSU34510
BSU15330	BSU34520
BSU15330	BSU35240
BSU15330	BSU35800
BSU15330	BSU35810
BSU15330	BSU35820
BSU15330	BSU37510
BSU15330	BSU37620
BSU15330	BSU39590
BSU15330	BSU40870
BSU15330	BSU40880
BSU15470	BSU15470
BSU15470	BSU15480
BSU15470	BSU15490
BSU15470	BSU15500
BSU15470	BSU15510
BSU15470	BSU15520
BSU15470	BSU15530
BSU15470	BSU15540
BSU15470	BSU15550
BSU15470	BSU15560
BSU15880	BSU09540
BSU15880	BSU10170
BSU15880	BSU11330
BSU15880	BSU11340
BSU15880	BSU11720
BSU15880	BSU15880
BSU15880	BSU15890
BSU15880	BSU15900
BSU15880	BSU15910
BSU16170	BSU02390
BSU16170	BSU03480
BSU16170	BSU03490
BSU16170	BSU03500
BSU16170	BSU03510
BSU16170	BSU03520
BSU16170	BSU03770
BSU16170	BSU03780
BSU16170	BSU06310
BSU16170	BSU10420
BSU16170	BSU12920
BSU16170	BSU12930
BSU16170	BSU12940
BSU16170	BSU12950
BSU16170	BSU12960
BSU16170	BSU18000
BSU16170	BSU21760
BSU16170	BSU21770
BSU16170	BSU21870
BSU16170	BSU24030
BSU16170	BSU24040
BSU16170	BSU24050
BSU16170	BSU24060
BSU16170	BSU24070
BSU16170	BSU24080
BSU16170	BSU24090
BSU16170	BSU28250
BSU16170	BSU28260
BSU16170	BSU28270
BSU16170	BSU28280
BSU16170	BSU28290
BSU16170	BSU28300
BSU16170	BSU28310
BSU16170	BSU29680
BSU16170	BSU35360
BSU16170	BSU36640
BSU16170	BSU36650
BSU16170	BSU36660
BSU16170	BSU39340
BSU16170	BSU39350
BSU16170	BSU39360
BSU16170	BSU39370
BSU16170	BSU39380
BSU16170	BSU39390
BSU16470	BSU02050
BSU16470	BSU03440
BSU16470	BSU07350
BSU16470	BSU07360
BSU16470	BSU09370
BSU16470	BSU10380
BSU16470	BSU11570
BSU16470	BSU11940
BSU16470	BSU11950
BSU16470	BSU12120
BSU16470	BSU13680
BSU16470	BSU13690
BSU16470	BSU13950
BSU16470	BSU14010
BSU16470	BSU15960
BSU16470	BSU16180
BSU16470	BSU16190
BSU16470	BSU16200
BSU16470	BSU16210
BSU16470	BSU16220
BSU16470	BSU16230
BSU16470	BSU16240
BSU16470	BSU16250
BSU16470	BSU16260
BSU16470	BSU16270
BSU16470	BSU16280
BSU16470	BSU16290
BSU16470	BSU16299
BSU16470	BSU16300
BSU16470	BSU16310
BSU16470	BSU16320
BSU16470	BSU16330
BSU16470	BSU16340
BSU16470	BSU16350
BSU16470	BSU16360
BSU16470	BSU16370
BSU16470	BSU16380
BSU16470	BSU16390
BSU16470	BSU16400
BSU16470	BSU16410
BSU16470	BSU16420
BSU16470	BSU16430
BSU16470	BSU16440
BSU16470	BSU16450
BSU16470	BSU16460
BSU16470	BSU16470
BSU16470	BSU16480
BSU16470	BSU18610
BSU16470	BSU21940
BSU16470	BSU25200
BSU16470	BSU28890
BSU16470	BSU31230
BSU16470	BSU31240
BSU16470	BSU31250
BSU16470	BSU31260
BSU16470	BSU35320
BSU16470	BSU35330
BSU16470	BSU35340
BSU16470	BSU35350
BSU16470	BSU35360
BSU16470	BSU35400
BSU16470	BSU35410
BSU16470	BSU35420
BSU16470	BSU35430
BSU16470	BSU35440
BSU16470	BSU35620
BSU16470	BSU35630
BSU16470	BSU35640
BSU16470	BSU35780
BSU16470	BSU38100
BSU16470	BSU38110
BSU16470	BSU38400
BSU16470	BSU38500
BSU16470	BSU38510
BSU16470	BSU38520
BSU16470	BSU38530
BSU16470	BSU38540
BSU16470	BSU38850
BSU17450	BSU03280
BSU17450	BSU03290
BSU17450	BSU03300
BSU17450	BSU03310
BSU17450	BSU03320
BSU17450	BSU03330
BSU17450	BSU17450
BSU17450	BSU17460
BSU17450	BSU36640
BSU17450	BSU36650
BSU17450	BSU36660
BSU17590	BSU17570
BSU17590	BSU17580
BSU17590	BSU17600
BSU17590	BSU17610
BSU17850	BSU01520
BSU17850	BSU01530
BSU17850	BSU05630
BSU17850	BSU05640
BSU17850	BSU05650
BSU17850	BSU06060
BSU17850	BSU06070
BSU17850	BSU06610
BSU17850	BSU06620
BSU17850	BSU06630
BSU17850	BSU09810
BSU17850	BSU09910
BSU17850	BSU09920
BSU17850	BSU09930
BSU17850	BSU10470
BSU17850	BSU10480
BSU17850	BSU10490
BSU17850	BSU12500
BSU17850	BSU13800
BSU17850	BSU16940
BSU17850	BSU17260
BSU17850	BSU17850
BSU17850	BSU17860
BSU17850	BSU17870
BSU17850	BSU17880
BSU17850	BSU18090
BSU17850	BSU18100
BSU17850	BSU18930
BSU17850	BSU18940
BSU17850	BSU18950
BSU17850	BSU18960
BSU17850	BSU20430
BSU17850	BSU20440
BSU17850	BSU21500
BSU17850	BSU21510
BSU17850	BSU21520
BSU17850	BSU22790
BSU17850	BSU23300
BSU17850	BSU23700
BSU17850	BSU23710
BSU17850	BSU23720
BSU17850	BSU24740
BSU17850	BSU24750
BSU17850	BSU25690
BSU17850	BSU27730
BSU17850	BSU27740
BSU17850	BSU28490
BSU17850	BSU29230
BSU17850	BSU35160
BSU17850	BSU35170
BSU17850	BSU35770
BSU17850	BSU38090
BSU18420	BSU14850
BSU18420	BSU14860
BSU18460	BSU18440
BSU18460	BSU18450
BSU18460	BSU18460
BSU19200	BSU19180
BSU19540	BSU11500
BSU22120	BSU22090
BSU22120	BSU22100
BSU22120	BSU22110
BSU22120	BSU22120
BSU22440	BSU30180
BSU22440	BSU30190
BSU22440	BSU30200
BSU22440	BSU30210
BSU22440	BSU30220
BSU22440	BSU30230
BSU22440	BSU30240
BSU22770	BSU00750
BSU22770	BSU00760
BSU22770	BSU00770
BSU22770	BSU00780
BSU22770	BSU00790
BSU22770	BSU00800
BSU22770	BSU00810
BSU22770	BSU00820
BSU22770	BSU02540
BSU22770	BSU10010
BSU22770	BSU22600
BSU22770	BSU22610
BSU22770	BSU22620
BSU22770	BSU22630
BSU22770	BSU22640
BSU22770	BSU22650
BSU22770	BSU22660
BSU22770	BSU22670
BSU22770	BSU22680
BSU22790	BSU22790
BSU23100	BSU00620
BSU23100	BSU00630
BSU23100	BSU02270
BSU23100	BSU02280
BSU23100	BSU02290
BSU23100	BSU08600
BSU23100	BSU11490
BSU23100	BSU11500
BSU23100	BSU14480
BSU23100	BSU16950
BSU23100	BSU23090
BSU23100	BSU23100
BSU23100	BSU23830
BSU23100	BSU27180
BSU23100	BSU35650
BSU23100	BSU36380
BSU23100	BSU36530
BSU23100	BSU36540
BSU23100	BSU38260
BSU23100	BSU38500
BSU23100	BSU38510
BSU23100	BSU38520
BSU23100	BSU38530
BSU23100	BSU38540
BSU23120	BSU03050
BSU23120	BSU03060
BSU23120	BSU03280
BSU23120	BSU03290
BSU23120	BSU03300
BSU23120	BSU09840
BSU23120	BSU13040
BSU23120	BSU14870
BSU23120	BSU14880
BSU23120	BSU14890
BSU23120	BSU14900
BSU23120	BSU14910
BSU23120	BSU14920
BSU23120	BSU14930
BSU23120	BSU17370
BSU23120	BSU17380
BSU23120	BSU17390
BSU23120	BSU17400
BSU23120	BSU22540
BSU23120	BSU22550
BSU23120	BSU22560
BSU23120	BSU23110
BSU23120	BSU23120
BSU23120	BSU23130
BSU23120	BSU23140
BSU23120	BSU23150
BSU23120	BSU29100
BSU23120	BSU29110
BSU23120	BSU37310
BSU23120	BSU37350
BSU23120	BSU37360
BSU23120	BSU37370
BSU23120	BSU37380
BSU23120	BSU37390
BSU23120	BSU37400
BSU23120	BSU37410
BSU23120	BSU37420
BSU23120	BSU37430
BSU23120	BSU38730
BSU23120	BSU38740
BSU23120	BSU38750
BSU23120	BSU38760
BSU23450	BSU00240
BSU23450	BSU08490
BSU23450	BSU09140
BSU23450	BSU09150
BSU23450	BSU10280
BSU23450	BSU10390
BSU23450	BSU14950
BSU23450	BSU14960
BSU23450	BSU15330
BSU23450	BSU18020
BSU23450	BSU18030
BSU23450	BSU22850
BSU23450	BSU22860
BSU23450	BSU23450
BSU23450	BSU23460
BSU23450	BSU23470
BSU23450	BSU23480
BSU23450	BSU24230
BSU23450	BSU24490
BSU23450	BSU24500
BSU23450	BSU24650
BSU23450	BSU25540
BSU23450	BSU27300
BSU23450	BSU27310
BSU23450	BSU27750
BSU23450	BSU28210
BSU23450	BSU29500
BSU23450	BSU29510
BSU23450	BSU30630
BSU23450	BSU32070
BSU23450	BSU33050
BSU23450	BSU33060
BSU23450	BSU33070
BSU23450	BSU36540
BSU23450	BSU36550
BSU23450	BSU36970
BSU23450	BSU37510
BSU23450	BSU37620
BSU23450	BSU38630
BSU23450	BSU40950
BSU23520	BSU01600
BSU23520	BSU01610
BSU23520	BSU01620
BSU23520	BSU01630
BSU23520	BSU01640
BSU23520	BSU03270
BSU23520	BSU03280
BSU23520	BSU03290
BSU23520	BSU03800
BSU23520	BSU03810
BSU23520	BSU03820
BSU23520	BSU03830
BSU23520	BSU04530
BSU23520	BSU07490
BSU23520	BSU07500
BSU23520	BSU07510
BSU23520	BSU07520
BSU23520	BSU07850
BSU23520	BSU08440
BSU23520	BSU08450
BSU23520	BSU08460
BSU23520	BSU08480
BSU23520	BSU10330
BSU23520	BSU14150
BSU23520	BSU14160
BSU23520	BSU14170
BSU23520	BSU18630
BSU23520	BSU22030
BSU23520	BSU31960
BSU23520	BSU31970
BSU23520	BSU31980
BSU23520	BSU31990
BSU23520	BSU32000
BSU23520	BSU32010
BSU23520	BSU32940
BSU23520	BSU33320
BSU23520	BSU37230
BSU23520	BSU38260
BSU23520	BSU38270
BSU23520	BSU38280
BSU23520	BSU39610
BSU23590	BSU23570
BSU23590	BSU23580
BSU23590	BSU23590
BSU24020	BSU24010
BSU24020	BSU24020
BSU24100	BSU24030
BSU24100	BSU24040
BSU24100	BSU24050
BSU24100	BSU24060
BSU24100	BSU24070
BSU24100	BSU24080
BSU24100	BSU24090
BSU24220	BSU00370
BSU24220	BSU00640
BSU24220	BSU01910
BSU24220	BSU01920
BSU24220	BSU01935
BSU24220	BSU01950
BSU24220	BSU01960
BSU24220	BSU01970
BSU24220	BSU01980
BSU24220	BSU13990
BSU24220	BSU14490
BSU24220	BSU15310
BSU24220	BSU15320
BSU24220	BSU15330
BSU24220	BSU23450
BSU24220	BSU23460
BSU24220	BSU23470
BSU24220	BSU24220
BSU24220	BSU24600
BSU24220	BSU24610
BSU24220	BSU24620
BSU24220	BSU24630
BSU24220	BSU24640
BSU24220	BSU25290
BSU24220	BSU31740
BSU24220	BSU33750
BSU24220	BSU33760
BSU24220	BSU33770
BSU24220	BSU37030
BSU24220	BSU37130
BSU24220	BSU38500
BSU24220	BSU38510
BSU24220	BSU38520
BSU24220	BSU38530
BSU24220	BSU38540
BSU24250	BSU11190
BSU24250	BSU11200
BSU24250	BSU11210
BSU24250	BSU11220
BSU24250	BSU11230
BSU24250	BSU11240
BSU24250	BSU11250
BSU24250	BSU37760
BSU24250	BSU37770
BSU24250	BSU37780
BSU24250	BSU40320
BSU24250	BSU40330
BSU24250	BSU40340
BSU24520	BSU04360
BSU24520	BSU30740
BSU24520	BSU30750
BSU24520	BSU30760
BSU24520	BSU30770
BSU24610	BSU10300
BSU24610	BSU14240
BSU24610	BSU24620
BSU24610	BSU24630
BSU24610	BSU24640
BSU24610	BSU34220
BSU24610	BSU34230
BSU24610	BSU34240
BSU24610	BSU34250
BSU24610	BSU34265
BSU24610	BSU34280
BSU24610	BSU34290
BSU24610	BSU34300
BSU24610	BSU34310
BSU24610	BSU34320
BSU24610	BSU34330
BSU24610	BSU34340
BSU24610	BSU34350
BSU24610	BSU34360
BSU24610	BSU34370
BSU24610	BSU38400
BSU25100	BSU02850
BSU25100	BSU02860
BSU25100	BSU02870
BSU25100	BSU03340
BSU25100	BSU03350
BSU25100	BSU03360
BSU25200	BSU00010
BSU25200	BSU00020
BSU25200	BSU00030
BSU25200	BSU00040
BSU25200	BSU00050
BSU25200	BSU00060
BSU25200	BSU00070
BSU25200	BSU00180
BSU25200	BSU00370
BSU25200	BSU00440
BSU25200	BSU00500
BSU25200	BSU00510
BSU25200	BSU00520
BSU25200	BSU00640
BSU25200	BSU00690
BSU25200	BSU00730
BSU25200	BSU00740
BSU25200	BSU00750
BSU25200	BSU00760
BSU25200	BSU00770
BSU25200	BSU00780
BSU25200	BSU00790
BSU25200	BSU00800
BSU25200	BSU00810
BSU25200	BSU00820
BSU25200	BSU00830
BSU25200	BSU00840
BSU25200	BSU00850
BSU25200	BSU00860
BSU25200	BSU00870
BSU25200	BSU00880
BSU25200	BSU00920
BSU25200	BSU00930
BSU25200	BSU00940
BSU25200	BSU00950
BSU25200	BSU00960
BSU25200	BSU00970
BSU25200	BSU00980
BSU25200	BSU01070
BSU25200	BSU01600
BSU25200	BSU01610
BSU25200	BSU01620
BSU25200	BSU01630
BSU25200	BSU01800
BSU25200	BSU01810
BSU25200	BSU01820
BSU25200	BSU01910
BSU25200	BSU01920
BSU25200	BSU01935
BSU25200	BSU01950
BSU25200	BSU01960
BSU25200	BSU01970
BSU25200	BSU01980
BSU25200	BSU02130
BSU25200	BSU02140
BSU25200	BSU02230
BSU25200	BSU02270
BSU25200	BSU02280
BSU25200	BSU02290
BSU25200	BSU02420
BSU25200	BSU02430
BSU25200	BSU02530
BSU25200	BSU02540
BSU25200	BSU02620
BSU25200	BSU02670
BSU25200	BSU02680
BSU25200	BSU02690
BSU25200	BSU02850
BSU25200	BSU02860
BSU25200	BSU02870
BSU25200	BSU02890
BSU25200	BSU02900
BSU25200	BSU02910
BSU25200	BSU02920
BSU25200	BSU02930
BSU25200	BSU02940
BSU25200	BSU02980
BSU25200	BSU02990
BSU25200	BSU03000
BSU25200	BSU03010
BSU25200	BSU03040
BSU25200	BSU03050
BSU25200	BSU03060
BSU25200	BSU03130
BSU25200	BSU03280
BSU25200	BSU03290
BSU25200	BSU03300
BSU25200	BSU03310
BSU25200	BSU03320
BSU25200	BSU03330
BSU25200	BSU03340
BSU25200	BSU03350
BSU25200	BSU03360
BSU25200	BSU03410
BSU25200	BSU03480
BSU25200	BSU03490
BSU25200	BSU03500
BSU25200	BSU03510
BSU25200	BSU03520
BSU25200	BSU03770
BSU25200	BSU03780
BSU25200	BSU03890
BSU25200	BSU03900
BSU25200	BSU03910
BSU25200	BSU04250
BSU25200	BSU04470
BSU25200	BSU04670
BSU25200	BSU04680
BSU25200	BSU04690
BSU25200	BSU04700
BSU25200	BSU04710
BSU25200	BSU04720
BSU25200	BSU04730
BSU25200	BSU04740
BSU25200	BSU05020
BSU25200	BSU05430
BSU25200	BSU05450
BSU25200	BSU05730
BSU25200	BSU05740
BSU25200	BSU06020
BSU25200	BSU06030
BSU25200	BSU06150
BSU25200	BSU06160
BSU25200	BSU06230
BSU25200	BSU06310
BSU25200	BSU06360
BSU25200	BSU06420
BSU25200	BSU06430
BSU25200	BSU06440
BSU25200	BSU06450
BSU25200	BSU06460
BSU25200	BSU06470
BSU25200	BSU06480
BSU25200	BSU06490
BSU25200	BSU06500
BSU25200	BSU06510
BSU25200	BSU06520
BSU25200	BSU06530
BSU25200	BSU06660
BSU25200	BSU06830
BSU25200	BSU07390
BSU25200	BSU07400
BSU25200	BSU07610
BSU25200	BSU07620
BSU25200	BSU07680
BSU25200	BSU07690
BSU25200	BSU07800
BSU25200	BSU07810
BSU25200	BSU07820
BSU25200	BSU07880
BSU25200	BSU07890
BSU25200	BSU07900
BSU25200	BSU08180
BSU25200	BSU08190
BSU25200	BSU08200
BSU25200	BSU08650
BSU25200	BSU08660
BSU25200	BSU08730
BSU25200	BSU08830
BSU25200	BSU08840
BSU25200	BSU08850
BSU25200	BSU08860
BSU25200	BSU08870
BSU25200	BSU09100
BSU25200	BSU09130
BSU25200	BSU09280
BSU25200	BSU09290
BSU25200	BSU09300
BSU25200	BSU09410
BSU25200	BSU09420
BSU25200	BSU09430
BSU25200	BSU09440
BSU25200	BSU09500
BSU25200	BSU09510
BSU25200	BSU09520
BSU25200	BSU09840
BSU25200	BSU10010
BSU25200	BSU10110
BSU25200	BSU10270
BSU25200	BSU10300
BSU25200	BSU10420
BSU25200	BSU10550
BSU25200	BSU10620
BSU25200	BSU10630
BSU25200	BSU11190
BSU25200	BSU11200
BSU25200	BSU11210
BSU25200	BSU11220
BSU25200	BSU11230
BSU25200	BSU11240
BSU25200	BSU11250
BSU25200	BSU11300
BSU25200	BSU11310
BSU25200	BSU11330
BSU25200	BSU11340
BSU25200	BSU11500
BSU25200	BSU11520
BSU25200	BSU11870
BSU25200	BSU11880
BSU25200	BSU12020
BSU25200	BSU12300
BSU25200	BSU12310
BSU25200	BSU12320
BSU25200	BSU12330
BSU25200	BSU12340
BSU25200	BSU12350
BSU25200	BSU12360
BSU25200	BSU12370
BSU25200	BSU12380
BSU25200	BSU12390
BSU25200	BSU12430
BSU25200	BSU12440
BSU25200	BSU12900
BSU25200	BSU12920
BSU25200	BSU12930
BSU25200	BSU12940
BSU25200	BSU12950
BSU25200	BSU12960
BSU25200	BSU13040
BSU25200	BSU13140
BSU25200	BSU13170
BSU25200	BSU13330
BSU25200	BSU13540
BSU25200	BSU13550
BSU25200	BSU13560
BSU25200	BSU13570
BSU25200	BSU13580
BSU25200	BSU13590
BSU25200	BSU13600
BSU25200	BSU13610
BSU25200	BSU13620
BSU25200	BSU13640
BSU25200	BSU13700
BSU25200	BSU13850
BSU25200	BSU13890
BSU25200	BSU13900
BSU25200	BSU13910
BSU25200	BSU14060
BSU25200	BSU14071
BSU25200	BSU14140
BSU25200	BSU14150
BSU25200	BSU14160
BSU25200	BSU14170
BSU25200	BSU14490
BSU25200	BSU14580
BSU25200	BSU14590
BSU25200	BSU14600
BSU25200	BSU14610
BSU25200	BSU14730
BSU25200	BSU14740
BSU25200	BSU14870
BSU25200	BSU15240
BSU25200	BSU15250
BSU25200	BSU15260
BSU25200	BSU15270
BSU25200	BSU15280
BSU25200	BSU15290
BSU25200	BSU15310
BSU25200	BSU15320
BSU25200	BSU15330
BSU25200	BSU15470
BSU25200	BSU15480
BSU25200	BSU15490
BSU25200	BSU15500
BSU25200	BSU15510
BSU25200	BSU15520
BSU25200	BSU15530
BSU25200	BSU15540
BSU25200	BSU15550
BSU25200	BSU15560
BSU25200	BSU15570
BSU25200	BSU15580
BSU25200	BSU15590
BSU25200	BSU15600
BSU25200	BSU15610
BSU25200	BSU15620
BSU25200	BSU15630
BSU25200	BSU15880
BSU25200	BSU15890
BSU25200	BSU15900
BSU25200	BSU15910
BSU25200	BSU15930
BSU25200	BSU15940
BSU25200	BSU15950
BSU25200	BSU15970
BSU25200	BSU15980
BSU25200	BSU16140
BSU25200	BSU16150
BSU25200	BSU16160
BSU25200	BSU16170
BSU25200	BSU16180
BSU25200	BSU16190
BSU25200	BSU16200
BSU25200	BSU16210
BSU25200	BSU16220
BSU25200	BSU16230
BSU25200	BSU16240
BSU25200	BSU16250
BSU25200	BSU16260
BSU25200	BSU16270
BSU25200	BSU16280
BSU25200	BSU16290
BSU25200	BSU16299
BSU25200	BSU16300
BSU25200	BSU16310
BSU25200	BSU16320
BSU25200	BSU16330
BSU25200	BSU16340
BSU25200	BSU16350
BSU25200	BSU16360
BSU25200	BSU16370
BSU25200	BSU16380
BSU25200	BSU16390
BSU25200	BSU16400
BSU25200	BSU16410
BSU25200	BSU16420
BSU25200	BSU16430
BSU25200	BSU16440
BSU25200	BSU16450
BSU25200	BSU16460
BSU25200	BSU16470
BSU25200	BSU16480
BSU25200	BSU16600
BSU25200	BSU16610
BSU25200	BSU16620
BSU25200	BSU16630
BSU25200	BSU16640
BSU25200	BSU16650
BSU25200	BSU16750
BSU25200	BSU16760
BSU25200	BSU16770
BSU25200	BSU16800
BSU25200	BSU16940
BSU25200	BSU17260
BSU25200	BSU17370
BSU25200	BSU17380
BSU25200	BSU17390
BSU25200	BSU17400
BSU25200	BSU17450
BSU25200	BSU17460
BSU25200	BSU17570
BSU25200	BSU17580
BSU25200	BSU17600
BSU25200	BSU17610
BSU25200	BSU17930
BSU25200	BSU17940
BSU25200	BSU17950
BSU25200	BSU18000
BSU25200	BSU18440
BSU25200	BSU18450
BSU25200	BSU18460
BSU25200	BSU18840
BSU25200	BSU19180
BSU25200	BSU19210
BSU25200	BSU19360
BSU25200	BSU19370
BSU25200	BSU22060
BSU25200	BSU22070
BSU25200	BSU22090
BSU25200	BSU22100
BSU25200	BSU22110
BSU25200	BSU22120
BSU25200	BSU22540
BSU25200	BSU22550
BSU25200	BSU22560
BSU25200	BSU22600
BSU25200	BSU22610
BSU25200	BSU22620
BSU25200	BSU22630
BSU25200	BSU22640
BSU25200	BSU22650
BSU25200	BSU22660
BSU25200	BSU22670
BSU25200	BSU22680
BSU25200	BSU22770
BSU25200	BSU22780
BSU25200	BSU22790
BSU25200	BSU22960
BSU25200	BSU23090
BSU25200	BSU23100
BSU25200	BSU23110
BSU25200	BSU23120
BSU25200	BSU23130
BSU25200	BSU23140
BSU25200	BSU23150
BSU25200	BSU23240
BSU25200	BSU23250
BSU25200	BSU23260
BSU25200	BSU23270
BSU25200	BSU23280
BSU25200	BSU23310
BSU25200	BSU23360
BSU25200	BSU23490
BSU25200	BSU23500
BSU25200	BSU23520
BSU25200	BSU23570
BSU25200	BSU23580
BSU25200	BSU24010
BSU25200	BSU24020
BSU25200	BSU24220
BSU25200	BSU24280
BSU25200	BSU24600
BSU25200	BSU24610
BSU25200	BSU24620
BSU25200	BSU24630
BSU25200	BSU24640
BSU25200	BSU24660
BSU25200	BSU24670
BSU25200	BSU24680
BSU25200	BSU24690
BSU25200	BSU24700
BSU25200	BSU24710
BSU25200	BSU24720
BSU25200	BSU24730
BSU25200	BSU24950
BSU25200	BSU24960
BSU25200	BSU24970
BSU25200	BSU24980
BSU25200	BSU24990
BSU25200	BSU25200
BSU25200	BSU25210
BSU25200	BSU25220
BSU25200	BSU25230
BSU25200	BSU25290
BSU25200	BSU25300
BSU25200	BSU25430
BSU25200	BSU25440
BSU25200	BSU25450
BSU25200	BSU25460
BSU25200	BSU25470
BSU25200	BSU25480
BSU25200	BSU25490
BSU25200	BSU25500
BSU25200	BSU25510
BSU25200	BSU25570
BSU25200	BSU25580
BSU25200	BSU25590
BSU25200	BSU25690
BSU25200	BSU25780
BSU25200	BSU25790
BSU25200	BSU25800
BSU25200	BSU25810
BSU25200	BSU25840
BSU25200	BSU26050
BSU25200	BSU26590
BSU25200	BSU26600
BSU25200	BSU26670
BSU25200	BSU27240
BSU25200	BSU27250
BSU25200	BSU27260
BSU25200	BSU27270
BSU25200	BSU27280
BSU25200	BSU27500
BSU25200	BSU27510
BSU25200	BSU27520
BSU25200	BSU27850
BSU25200	BSU27860
BSU25200	BSU27870
BSU25200	BSU27880
BSU25200	BSU27890
BSU25200	BSU27920
BSU25200	BSU27930
BSU25200	BSU28070
BSU25200	BSU28080
BSU25200	BSU28090
BSU25200	BSU28120
BSU25200	BSU28130
BSU25200	BSU28140
BSU25200	BSU28150
BSU25200	BSU28160
BSU25200	BSU28170
BSU25200	BSU28190
BSU25200	BSU28200
BSU25200	BSU28220
BSU25200	BSU28250
BSU25200	BSU28260
BSU25200	BSU28270
BSU25200	BSU28280
BSU25200	BSU28290
BSU25200	BSU28300
BSU25200	BSU28310
BSU25200	BSU28430
BSU25200	BSU28440
BSU25200	BSU28450
BSU25200	BSU28470
BSU25200	BSU28500
BSU25200	BSU28510
BSU25200	BSU28520
BSU25200	BSU28530
BSU25200	BSU28540
BSU25200	BSU28550
BSU25200	BSU28630
BSU25200	BSU28640
BSU25200	BSU28720
BSU25200	BSU28730
BSU25200	BSU28740
BSU25200	BSU28750
BSU25200	BSU28760
BSU25200	BSU28770
BSU25200	BSU28780
BSU25200	BSU28790
BSU25200	BSU28800
BSU25200	BSU28810
BSU25200	BSU28840
BSU25200	BSU28850
BSU25200	BSU28860
BSU25200	BSU28870
BSU25200	BSU28950
BSU25200	BSU29010
BSU25200	BSU29020
BSU25200	BSU29100
BSU25200	BSU29110
BSU25200	BSU29120
BSU25200	BSU29130
BSU25200	BSU29140
BSU25200	BSU29280
BSU25200	BSU29290
BSU25200	BSU29300
BSU25200	BSU29310
BSU25200	BSU29320
BSU25200	BSU29330
BSU25200	BSU29340
BSU25200	BSU29350
BSU25200	BSU29360
BSU25200	BSU29370
BSU25200	BSU29380
BSU25200	BSU29390
BSU25200	BSU29400
[truncated: 978 more rows]

## Sheet: Table S8
Table S8: Regulatory interactions in transcriptional regulatory network (TRN) of B. subtilis without s-factors.
Source	Target
BSU00010	BSU00010
BSU00010	BSU00020
BSU00010	BSU25690
BSU00370	BSU00370
BSU00370	BSU00490
BSU00370	BSU01740
BSU00370	BSU01910
BSU00370	BSU01920
BSU00370	BSU01935
BSU00370	BSU01950
BSU00370	BSU01960
BSU00370	BSU01970
BSU00370	BSU01980
BSU00370	BSU03960
BSU00370	BSU08810
BSU00370	BSU09990
BSU00370	BSU10300
BSU00370	BSU10420
BSU00370	BSU11190
BSU00370	BSU11200
BSU00370	BSU11210
BSU00370	BSU11220
BSU00370	BSU11230
BSU00370	BSU11240
BSU00370	BSU11250
BSU00370	BSU12920
BSU00370	BSU12930
BSU00370	BSU12940
BSU00370	BSU12950
BSU00370	BSU12960
BSU00370	BSU13640
BSU00370	BSU14240
BSU00370	BSU14340
BSU00370	BSU14350
BSU00370	BSU14360
BSU00370	BSU14370
BSU00370	BSU15280
BSU00370	BSU15290
BSU00370	BSU18000
BSU00370	BSU18780
BSU00370	BSU19210
BSU00370	BSU24600
BSU00370	BSU24610
BSU00370	BSU27160
BSU00370	BSU27170
BSU00370	BSU31450
BSU00370	BSU31460
BSU00370	BSU33120
BSU00370	BSU33750
BSU00370	BSU33760
BSU00370	BSU33770
BSU00370	BSU33780
BSU00370	BSU33790
BSU00370	BSU34430
BSU00370	BSU34440
BSU00370	BSU35100
BSU00370	BSU35110
BSU00370	BSU35120
BSU00370	BSU35130
BSU00370	BSU35910
BSU00370	BSU35920
BSU00370	BSU35930
BSU00370	BSU35940
BSU00370	BSU35950
BSU00370	BSU35960
BSU00370	BSU37350
BSU00370	BSU37360
BSU00370	BSU37370
BSU00370	BSU37380
BSU00370	BSU37390
BSU00370	BSU37400
BSU00370	BSU37410
BSU00370	BSU37420
BSU00370	BSU37430
BSU00370	BSU38790
BSU00370	BSU39340
BSU00370	BSU39350
BSU00370	BSU39360
BSU00370	BSU39370
BSU00370	BSU39380
BSU00370	BSU39390
BSU00370	BSU39820
BSU00370	BSU39870
BSU00370	BSU39880
BSU00370	BSU39900
BSU00370	BSU39910
BSU00370	BSU39920
BSU00370	BSU39930
BSU00470	BSU00470
BSU00470	BSU00480
BSU00470	BSU06370
BSU00470	BSU06420
BSU00470	BSU06430
BSU00470	BSU06440
BSU00470	BSU06450
BSU00470	BSU06460
BSU00470	BSU06470
BSU00470	BSU06480
BSU00470	BSU06490
BSU00470	BSU06500
BSU00470	BSU06510
BSU00470	BSU06520
BSU00470	BSU06530
BSU00470	BSU15470
BSU00470	BSU15480
BSU00470	BSU15490
BSU00470	BSU15500
BSU00470	BSU15510
BSU00470	BSU15520
BSU00470	BSU15530
BSU00470	BSU15540
BSU00470	BSU15550
BSU00470	BSU15560
BSU00470	BSU22060
BSU00470	BSU22070
BSU00470	BSU24310
BSU00470	BSU24320
BSU00470	BSU29990
BSU00470	BSU32130
BSU00470	BSU36900
BSU00470	BSU40420
BSU00560	BSU00560
BSU00560	BSU02080
BSU00560	BSU01550
BSU00560	BSU02070
BSU00560	BSU03700
BSU00560	BSU03710
BSU00560	BSU03720
BSU00560	BSU03920
BSU00560	BSU03930
BSU00560	BSU08660
BSU00560	BSU09750
BSU00560	BSU13470
BSU00560	BSU23380
BSU00560	BSU23390
BSU00560	BSU23401
BSU00560	BSU23410
BSU00560	BSU23420
BSU00560	BSU23430
BSU00560	BSU23440
BSU00560	BSU23460
BSU00560	BSU23470
BSU00560	BSU23480
BSU00560	BSU24230
BSU00560	BSU25540
BSU00560	BSU27750
BSU00560	BSU29570
BSU00560	BSU33050
BSU00560	BSU33060
BSU00560	BSU33070
BSU00560	BSU35800
BSU00560	BSU35810
BSU00560	BSU35820
BSU00830	BSU00830
BSU00830	BSU00840
BSU00830	BSU00850
BSU00830	BSU00860
BSU00830	BSU00870
BSU00830	BSU00880
BSU00830	BSU13700
BSU00830	BSU28190
BSU00830	BSU28200
BSU00830	BSU28220
BSU00830	BSU28500
BSU00830	BSU34540
BSU01540	BSU09990
BSU01810	BSU01800
BSU01810	BSU01810
BSU01810	BSU01820
BSU02440	BSU02420
BSU02440	BSU02430
BSU02680	BSU02670
BSU02680	BSU02680
BSU02680	BSU39970
BSU02680	BSU39980
BSU03470	BSU03450
BSU03470	BSU03460
BSU03890	BSU03890
BSU03890	BSU03900
BSU03890	BSU03910
BSU04100	BSU04050
BSU04100	BSU04060
BSU04100	BSU04070
BSU04100	BSU04080
BSU04100	BSU04090
BSU04100	BSU04100
BSU04100	BSU04110
BSU04250	BSU04250
BSU04460	BSU04470
BSU05050	BSU36900
BSU05060	BSU36900
BSU05420	BSU05430
BSU05970	BSU03050
BSU05970	BSU03060
BSU05970	BSU36000
BSU05970	BSU36010
BSU05970	BSU38060
BSU05970	BSU38730
BSU05970	BSU38740
BSU05970	BSU38750
BSU05970	BSU38760
BSU06140	BSU06150
BSU06140	BSU06160
BSU07590	BSU07610
BSU07590	BSU07620
BSU07820	BSU07800
BSU07820	BSU07810
BSU07820	BSU07820
BSU08100	BSU08060
BSU08100	BSU08070
BSU08100	BSU08080
BSU08100	BSU08090
BSU08190	BSU08180
BSU08190	BSU08190
BSU08190	BSU08200
BSU08620	BSU08620
BSU08620	BSU08630
BSU08620	BSU08650
BSU08620	BSU08660
BSU08730	BSU03480
BSU08730	BSU03490
BSU08730	BSU03500
BSU08730	BSU03510
BSU08730	BSU03520
BSU08730	BSU08730
BSU08730	BSU08820
BSU08730	BSU11500
BSU08730	BSU13850
BSU08730	BSU23520
BSU08730	BSU28120
BSU08730	BSU28130
BSU08730	BSU28140
BSU08730	BSU28150
BSU08730	BSU28160
BSU08730	BSU28170
BSU08730	BSU32990
BSU08730	BSU40090
BSU08730	BSU40100
BSU08810	BSU08810
BSU08810	BSU09990
BSU09270	BSU02130
BSU09270	BSU02140
BSU09270	BSU09280
BSU09270	BSU09290
BSU09270	BSU09300
BSU09380	BSU03280
BSU09380	BSU03290
BSU09380	BSU03300
BSU09380	BSU13040
BSU09380	BSU37310
BSU09430	BSU09440
BSU09990	BSU03670
BSU09990	BSU10300
BSU09990	BSU11360
BSU09990	BSU11370
BSU09990	BSU11380
BSU09990	BSU11390
BSU09990	BSU11400
BSU09990	BSU11430
BSU09990	BSU11440
BSU09990	BSU11450
BSU09990	BSU11460
BSU09990	BSU11470
BSU09990	BSU14700
BSU09990	BSU24280
BSU09990	BSU24600
BSU09990	BSU24610
BSU09990	BSU38400
BSU10420	BSU02010
BSU10420	BSU03420
BSU10420	BSU03430
BSU10420	BSU06830
BSU10420	BSU09050
BSU10420	BSU09060
BSU10420	BSU09070
BSU10420	BSU09080
BSU10420	BSU09090
BSU10420	BSU09100
BSU10420	BSU10420
BSU10420	BSU10450
BSU10420	BSU10620
BSU10420	BSU10630
BSU10420	BSU10640
BSU10420	BSU10650
BSU10420	BSU10660
BSU10420	BSU14240
BSU10420	BSU40900
BSU10420	BSU16110
BSU10420	BSU16940
BSU10420	BSU17860
BSU10420	BSU17870
BSU10420	BSU17880
BSU10420	BSU21940
BSU10420	BSU24660
BSU10420	BSU24670
BSU10420	BSU24680
BSU10420	BSU24690
BSU10420	BSU24700
BSU10420	BSU24710
BSU10420	BSU24720
BSU10420	BSU24730
BSU10420	BSU25570
BSU10420	BSU25580
BSU10420	BSU25590
BSU10420	BSU28040
BSU10420	BSU28070
BSU10420	BSU33260
BSU10420	BSU33270
BSU10420	BSU33280
BSU10420	BSU33470
BSU10420	BSU33480
BSU10420	BSU35400
BSU10420	BSU35410
BSU10420	BSU35420
BSU10420	BSU35430
BSU10420	BSU35440
BSU10420	BSU35450
BSU10420	BSU35460
BSU10420	BSU35470
BSU10420	BSU36300
BSU10420	BSU36310
BSU10420	BSU40890
BSU10420	BSU40910
BSU10420	BSU40920
BSU10420	BSU40990
BSU10420	BSU41000
BSU10420	BSU41010
BSU10420	BSU41020
BSU10560	BSU10550
BSU11130	BSU24280
BSU11300	BSU10420
BSU11310	BSU24660
BSU11310	BSU24670
BSU11310	BSU24680
BSU11310	BSU24690
BSU11310	BSU24700
BSU11310	BSU24710
BSU11310	BSU24720
BSU11310	BSU24730
BSU11500	BSU08830
BSU11500	BSU08840
BSU11500	BSU08850
BSU11500	BSU08860
BSU11500	BSU08870
BSU11500	BSU14730
BSU11500	BSU14740
BSU11500	BSU29280
BSU11500	BSU29290
BSU11500	BSU29300
BSU11500	BSU29310
BSU11500	BSU29320
BSU11500	BSU29330
BSU11500	BSU29340
BSU11500	BSU29350
BSU11500	BSU29360
BSU11500	BSU29370
BSU11500	BSU29380
BSU11500	BSU29390
BSU11500	BSU29400
BSU11500	BSU39460
BSU11500	BSU39470
BSU11500	BSU39480
BSU11500	BSU39490
BSU11500	BSU39500
BSU11500	BSU39510
BSU11650	BSU09410
BSU11650	BSU10300
BSU11650	BSU14700
BSU11650	BSU34450
BSU11650	BSU34460
BSU11650	BSU34470
BSU11660	BSU11650
BSU11660	BSU11660
BSU11660	BSU11670
BSU11660	BSU11680
BSU11660	BSU11690
BSU11660	BSU11700
BSU11660	BSU11710
BSU12370	BSU12300
BSU12370	BSU12310
BSU12370	BSU12320
BSU12370	BSU12330
BSU12370	BSU12340
BSU12370	BSU12350
BSU12370	BSU12360
BSU12370	BSU12370
BSU12370	BSU12380
BSU12370	BSU12390
BSU12510	BSU12510
BSU12510	BSU12520
BSU12510	BSU12530
BSU12510	BSU12540
BSU12510	BSU12550
BSU12560	BSU12570
BSU12560	BSU12580
BSU12560	BSU12590
BSU12560	BSU12600
BSU12560	BSU12610
BSU12560	BSU12620
BSU12560	BSU12630
BSU12560	BSU12640
BSU12560	BSU12650
BSU12560	BSU12660
BSU12900	BSU12900
BSU13150	BSU13140
BSU13310	BSU02690
BSU13310	BSU03280
BSU13310	BSU03290
BSU13310	BSU03300
BSU13310	BSU03310
BSU13310	BSU03320
BSU13310	BSU03330
BSU13310	BSU04050
BSU13310	BSU04060
BSU13310	BSU04070
BSU13310	BSU04080
BSU13310	BSU04090
BSU13310	BSU04100
BSU13310	BSU04110
BSU13310	BSU06310
BSU13310	BSU07560
BSU13310	BSU11430
BSU13310	BSU11440
BSU13310	BSU11450
BSU13310	BSU11460
BSU13310	BSU11470
BSU13310	BSU13310
BSU13310	BSU13320
BSU13310	BSU13330
BSU13310	BSU17450
BSU13310	BSU17460
BSU13310	BSU18000
BSU13310	BSU18120
BSU13310	BSU18440
BSU13310	BSU18450
BSU13310	BSU19580
BSU13310	BSU24030
BSU13310	BSU24040
BSU13310	BSU24050
BSU13310	BSU24060
BSU13310	BSU24070
BSU13310	BSU24080
BSU13310	BSU24090
BSU13310	BSU27430
BSU13310	BSU27440
BSU13310	BSU27450
BSU13310	BSU27460
BSU13310	BSU28250
BSU13310	BSU28260
BSU13310	BSU28270
BSU13310	BSU28280
BSU13310	BSU28290
BSU13310	BSU28300
BSU13310	BSU28310
BSU13310	BSU30360
BSU13310	BSU32430
BSU13310	BSU32440
BSU13310	BSU32450
BSU13310	BSU32460
BSU13310	BSU36100
BSU13310	BSU36510
BSU13310	BSU36520
BSU13310	BSU36910
BSU13310	BSU36920
BSU13310	BSU37930
BSU13310	BSU37940
BSU13310	BSU37950
BSU13310	BSU38850
BSU13310	BSU40470
BSU13310	BSU40480
BSU13880	BSU13890
BSU13880	BSU13900
BSU13880	BSU13910
BSU13920	BSU13920
BSU13920	BSU13930
BSU14140	BSU14140
BSU14140	BSU18000
BSU14140	BSU29120
BSU14140	BSU29130
BSU14140	BSU29140
BSU14240	BSU10420
BSU14240	BSU11920
BSU14240	BSU14240
BSU14240	BSU21440
BSU14240	BSU21450
BSU14240	BSU21460
BSU14240	BSU21470
BSU14240	BSU21480
BSU14240	BSU33750
BSU14240	BSU33760
BSU14240	BSU33770
BSU14240	BSU37350
BSU14240	BSU37360
BSU14240	BSU37370
BSU14240	BSU37380
BSU14240	BSU37390
BSU14240	BSU37400
BSU14240	BSU37410
BSU14240	BSU37420
BSU14240	BSU37430
BSU14240	BSU39940
BSU14240	BSU39950
BSU14240	BSU40140
BSU14240	BSU40150
BSU14240	BSU40160
BSU14240	BSU40580
BSU14240	BSU40590
BSU14240	BSU40600
BSU14240	BSU40610
BSU14240	BSU40620
BSU14380	BSU14380
BSU14380	BSU14390
BSU14380	BSU14400
BSU14730	BSU14710
BSU14730	BSU14720
BSU14730	BSU14730
BSU14730	BSU14740
BSU15090	BSU11740
BSU15090	BSU11750
BSU15090	BSU19780
BSU15090	BSU19790
BSU15090	BSU23530
BSU15090	BSU24360
BSU15090	BSU24370
BSU15090	BSU24380
BSU15090	BSU24390
BSU15090	BSU24400
BSU15090	BSU24410
BSU15090	BSU24420
BSU15090	BSU24430
BSU15090	BSU24440
BSU15090	BSU25520
BSU15090	BSU25530
BSU15090	BSU36070
BSU15470	BSU15470
BSU15470	BSU15480
BSU15470	BSU15490
BSU15470	BSU15500
BSU15470	BSU15510
BSU15470	BSU15520
BSU15470	BSU15530
BSU15470	BSU15540
BSU15470	BSU15550
BSU15470	BSU15560
BSU15880	BSU09540
BSU15880	BSU10170
BSU15880	BSU11330
BSU15880	BSU11340
BSU15880	BSU11720
BSU15880	BSU15880
BSU15880	BSU15890
BSU15880	BSU15900
BSU15880	BSU15910
BSU16170	BSU02390
BSU16170	BSU03480
BSU16170	BSU03490
BSU16170	BSU03500
BSU16170	BSU03510
BSU16170	BSU03520
BSU16170	BSU03770
BSU16170	BSU03780
BSU16170	BSU06310
BSU16170	BSU10420
BSU16170	BSU12920
BSU16170	BSU12930
BSU16170	BSU12940
BSU16170	BSU12950
BSU16170	BSU12960
BSU16170	BSU18000
BSU16170	BSU21760
BSU16170	BSU21770
BSU16170	BSU21870
BSU16170	BSU24030
BSU16170	BSU24040
BSU16170	BSU24050
BSU16170	BSU24060
BSU16170	BSU24070
BSU16170	BSU24080
BSU16170	BSU24090
BSU16170	BSU28250
BSU16170	BSU28260
BSU16170	BSU28270
BSU16170	BSU28280
BSU16170	BSU28290
BSU16170	BSU28300
BSU16170	BSU28310
BSU16170	BSU29680
BSU16170	BSU35360
BSU16170	BSU36640
BSU16170	BSU36650
BSU16170	BSU36660
BSU16170	BSU39340
BSU16170	BSU39350
BSU16170	BSU39360
BSU16170	BSU39370
BSU16170	BSU39380
BSU16170	BSU39390
BSU17450	BSU03280
BSU17450	BSU03290
BSU17450	BSU03300
BSU17450	BSU03310
BSU17450	BSU03320
BSU17450	BSU03330
BSU17450	BSU17450
BSU17450	BSU17460
BSU17450	BSU36640
BSU17450	BSU36650
BSU17450	BSU36660
BSU17590	BSU17570
BSU17590	BSU17580
BSU17590	BSU17600
BSU17590	BSU17610
BSU17850	BSU01520
BSU17850	BSU01530
BSU17850	BSU05630
BSU17850	BSU05640
BSU17850	BSU05650
BSU17850	BSU06060
BSU17850	BSU06070
BSU17850	BSU06610
BSU17850	BSU06620
BSU17850	BSU06630
BSU17850	BSU09810
BSU17850	BSU09910
BSU17850	BSU09920
BSU17850	BSU09930
BSU17850	BSU10470
BSU17850	BSU10480
BSU17850	BSU10490
BSU17850	BSU12500
BSU17850	BSU13800
BSU17850	BSU16940
BSU17850	BSU17260
BSU17850	BSU17850
BSU17850	BSU17860
BSU17850	BSU17870
BSU17850	BSU17880
BSU17850	BSU18090
BSU17850	BSU18100
BSU17850	BSU18930
BSU17850	BSU18940
BSU17850	BSU18950
BSU17850	BSU18960
BSU17850	BSU20430
BSU17850	BSU20440
BSU17850	BSU21500
BSU17850	BSU21510
BSU17850	BSU21520
BSU17850	BSU22790
BSU17850	BSU23300
BSU17850	BSU23700
BSU17850	BSU23710
BSU17850	BSU23720
BSU17850	BSU24740
BSU17850	BSU24750
BSU17850	BSU25690
BSU17850	BSU27730
BSU17850	BSU27740
BSU17850	BSU28490
BSU17850	BSU29230
BSU17850	BSU35160
BSU17850	BSU35170
BSU17850	BSU35770
BSU17850	BSU38090
BSU18420	BSU14850
BSU18420	BSU14860
BSU18460	BSU18440
BSU18460	BSU18450
BSU18460	BSU18460
BSU19200	BSU19180
BSU19540	BSU11500
BSU22120	BSU22090
BSU22120	BSU22100
BSU22120	BSU22110
BSU22120	BSU22120
BSU22440	BSU30180
BSU22440	BSU30190
BSU22440	BSU30200
BSU22440	BSU30210
BSU22440	BSU30220
BSU22440	BSU30230
BSU22440	BSU30240
BSU22770	BSU00750
BSU22770	BSU00760
BSU22770	BSU00770
BSU22770	BSU00780
BSU22770	BSU00790
BSU22770	BSU00800
BSU22770	BSU00810
BSU22770	BSU00820
BSU22770	BSU02540
BSU22770	BSU10010
BSU22770	BSU22600
BSU22770	BSU22610
BSU22770	BSU22620
BSU22770	BSU22630
BSU22770	BSU22640
BSU22770	BSU22650
BSU22770	BSU22660
BSU22770	BSU22670
BSU22770	BSU22680
BSU22790	BSU22790
BSU23120	BSU03050
BSU23120	BSU03060
BSU23120	BSU03280
BSU23120	BSU03290
BSU23120	BSU03300
BSU23120	BSU09840
BSU23120	BSU13040
BSU23120	BSU14870
BSU23120	BSU14880
BSU23120	BSU14890
BSU23120	BSU14900
BSU23120	BSU14910
BSU23120	BSU14920
BSU23120	BSU14930
BSU23120	BSU17370
BSU23120	BSU17380
BSU23120	BSU17390
BSU23120	BSU17400
BSU23120	BSU22540
BSU23120	BSU22550
BSU23120	BSU22560
BSU23120	BSU23110
BSU23120	BSU23120
BSU23120	BSU23130
BSU23120	BSU23140
BSU23120	BSU23150
BSU23120	BSU29100
BSU23120	BSU29110
BSU23120	BSU37310
BSU23120	BSU37350
BSU23120	BSU37360
BSU23120	BSU37370
BSU23120	BSU37380
BSU23120	BSU37390
BSU23120	BSU37400
BSU23120	BSU37410
BSU23120	BSU37420
BSU23120	BSU37430
BSU23120	BSU38730
BSU23120	BSU38740
BSU23120	BSU38750
BSU23120	BSU38760
BSU23520	BSU01600
BSU23520	BSU01610
BSU23520	BSU01620
BSU23520	BSU01630
BSU23520	BSU01640
BSU23520	BSU03270
BSU23520	BSU03280
BSU23520	BSU03290
BSU23520	BSU03800
BSU23520	BSU03810
BSU23520	BSU03820
BSU23520	BSU03830
BSU23520	BSU04530
BSU23520	BSU07490
BSU23520	BSU07500
BSU23520	BSU07510
BSU23520	BSU07520
BSU23520	BSU07850
BSU23520	BSU08440
BSU23520	BSU08450
BSU23520	BSU08460
BSU23520	BSU08480
BSU23520	BSU10330
BSU23520	BSU14150
BSU23520	BSU14160
BSU23520	BSU14170
BSU23520	BSU18630
BSU23520	BSU22030
BSU23520	BSU31960
BSU23520	BSU31970
BSU23520	BSU31980
BSU23520	BSU31990
BSU23520	BSU32000
BSU23520	BSU32010
BSU23520	BSU32940
BSU23520	BSU33320
BSU23520	BSU37230
BSU23520	BSU38260
BSU23520	BSU38270
BSU23520	BSU38280
BSU23520	BSU39610
BSU23590	BSU23570
BSU23590	BSU23580
BSU23590	BSU23590
BSU24020	BSU24010
BSU24020	BSU24020
BSU24100	BSU24030
BSU24100	BSU24040
BSU24100	BSU24050
BSU24100	BSU24060
BSU24100	BSU24070
BSU24100	BSU24080
BSU24100	BSU24090
BSU24220	BSU00370
BSU24220	BSU00640
BSU24220	BSU01910
BSU24220	BSU01920
BSU24220	BSU01935
BSU24220	BSU01950
BSU24220	BSU01960
BSU24220	BSU01970
BSU24220	BSU01980
BSU24220	BSU13990
BSU24220	BSU14490
BSU24220	BSU15310
BSU24220	BSU23460
BSU24220	BSU23470
BSU24220	BSU24220
BSU24220	BSU24600
BSU24220	BSU24610
BSU24220	BSU24620
BSU24220	BSU24630
BSU24220	BSU24640
BSU24220	BSU25290
BSU24220	BSU31740
BSU24220	BSU33750
BSU24220	BSU33760
BSU24220	BSU33770
BSU24220	BSU37030
BSU24220	BSU37130
BSU24220	BSU38500
BSU24220	BSU38510
BSU24220	BSU38520
BSU24220	BSU38530
BSU24220	BSU38540
BSU24250	BSU11190
BSU24250	BSU11200
BSU24250	BSU11210
BSU24250	BSU11220
BSU24250	BSU11230
BSU24250	BSU11240
BSU24250	BSU11250
BSU24250	BSU37760
BSU24250	BSU37770
BSU24250	BSU37780
BSU24250	BSU40320
BSU24250	BSU40330
BSU24250	BSU40340
BSU24520	BSU04360
BSU24520	BSU30740
BSU24520	BSU30750
BSU24520	BSU30760
BSU24520	BSU30770
BSU24610	BSU10300
BSU24610	BSU14240
BSU24610	BSU24620
BSU24610	BSU24630
BSU24610	BSU24640
BSU24610	BSU34220
BSU24610	BSU34230
BSU24610	BSU34240
BSU24610	BSU34250
BSU24610	BSU34265
BSU24610	BSU34280
BSU24610	BSU34290
BSU24610	BSU34300
BSU24610	BSU34310
BSU24610	BSU34320
BSU24610	BSU34330
BSU24610	BSU34340
BSU24610	BSU34350
BSU24610	BSU34360
BSU24610	BSU34370
BSU24610	BSU38400
BSU25100	BSU02850
BSU25100	BSU02860
BSU25100	BSU02870
BSU25100	BSU03340
BSU25100	BSU03350
BSU25100	BSU03360
BSU25240	BSU25240
BSU25240	BSU25250
BSU25250	BSU29010
BSU25250	BSU29020
BSU25250	BSU30560
BSU25490	BSU06020
BSU25490	BSU06030
BSU25490	BSU25430
BSU25490	BSU25440
BSU25490	BSU25450
BSU25490	BSU25460
BSU25490	BSU25470
BSU25490	BSU25480
BSU25490	BSU25490
BSU25810	BSU25780
BSU25810	BSU25790
BSU25810	BSU25800
BSU25810	BSU25810
BSU26580	BSU26590
BSU26580	BSU26600
BSU26670	BSU18440
BSU26670	BSU18450
BSU26670	BSU26670
BSU26720	BSU26680
BSU26720	BSU26690
BSU26720	BSU26700
BSU26720	BSU26710
BSU26720	BSU26720
BSU27080	BSU27030
BSU27080	BSU27040
BSU27080	BSU27050
BSU27080	BSU27060
BSU27080	BSU27070
BSU27170	BSU27160
BSU27170	BSU27170
BSU27520	BSU00730
BSU27520	BSU04520
BSU27520	BSU08830
BSU27520	BSU08840
BSU27520	BSU08850
BSU27520	BSU08860
BSU27520	BSU08870
BSU27520	BSU09130
BSU27520	BSU27240
BSU27520	BSU27250
BSU27520	BSU27260
BSU27520	BSU27270
BSU27520	BSU27280
BSU27520	BSU29280
BSU27520	BSU29290
BSU27520	BSU29300
BSU27520	BSU29310
BSU27520	BSU29320
BSU27520	BSU29330
BSU27520	BSU29340
BSU27520	BSU29350
BSU27520	BSU29360
BSU27520	BSU29370
BSU27520	BSU29380
BSU27520	BSU29390
BSU27520	BSU29400
BSU27520	BSU39460
BSU27520	BSU39470
BSU27520	BSU39480
BSU27520	BSU39490
BSU27520	BSU39500
BSU27520	BSU39510
BSU27520	BSU39520
BSU27890	BSU27850
BSU27890	BSU27860
BSU27890	BSU27870
BSU27890	BSU27880
BSU27890	BSU27890
BSU28410	BSU05550
BSU28410	BSU05560
BSU28410	BSU05570
BSU28410	BSU06300
BSU28410	BSU10670
BSU28410	BSU10680
BSU28410	BSU10690
BSU28410	BSU10700
BSU28410	BSU10710
BSU28410	BSU10720
BSU28410	BSU11740
BSU28410	BSU11750
BSU28410	BSU11760
BSU28410	BSU11770
BSU28410	BSU11780
BSU28410	BSU11809
BSU28410	BSU11810
BSU28410	BSU15950
BSU28410	BSU17700
BSU28410	BSU17970
BSU28410	BSU18670
BSU28410	BSU19750
BSU28410	BSU19760
BSU28410	BSU19770
BSU28410	BSU19780
BSU28410	BSU19790
BSU28410	BSU22200
BSU28410	BSU25710
BSU28410	BSU26390
BSU28410	BSU32640
BSU28410	BSU32650
BSU28410	BSU36050
BSU28410	BSU36060
BSU28410	BSU36070
BSU28550	BSU10270
BSU28550	BSU14060
BSU28550	BSU14071
BSU28550	BSU28520
BSU28550	BSU28530
BSU28550	BSU28540
BSU28550	BSU28550
BSU28550	BSU32820
BSU28550	BSU32830
BSU28550	BSU32840
BSU28550	BSU37160
BSU28550	BSU37170
BSU28550	BSU37180
BSU28850	BSU28840
BSU28850	BSU28850
BSU28850	BSU28860
BSU28850	BSU28870
BSU29110	BSU01910
BSU29110	BSU01920
BSU29110	BSU01935
BSU29110	BSU01950
BSU29110	BSU01960
BSU29110	BSU01970
BSU29110	BSU01980
BSU29110	BSU02130
BSU29110	BSU02620
BSU29110	BSU05730
BSU29110	BSU05740
BSU29110	BSU07840
BSU29110	BSU08980
BSU29110	BSU09410
BSU29110	BSU11990
BSU29110	BSU13330
BSU29110	BSU23110
BSU29110	BSU23120
BSU29110	BSU23130
BSU29110	BSU23140
BSU29110	BSU23150
BSU29110	BSU24950
BSU29110	BSU24960
BSU29110	BSU24970
BSU29110	BSU24980
BSU29110	BSU24990
BSU29110	BSU29100
BSU29110	BSU29110
BSU29110	BSU29630
BSU29110	BSU32540
BSU29110	BSU35540
BSU29110	BSU35550
BSU29110	BSU35560
BSU29110	BSU35570
BSU29110	BSU35580
BSU29110	BSU35590
BSU29110	BSU35600
BSU29110	BSU35720
BSU29110	BSU35730
BSU29110	BSU35740
BSU29110	BSU35750
BSU29110	BSU35760
BSU29110	BSU38090
BSU29400	BSU29280
BSU29400	BSU29290
BSU29400	BSU29300
BSU29400	BSU29310
BSU29400	BSU29320
BSU29400	BSU29330
BSU29400	BSU29340
BSU29400	BSU29350
BSU29400	BSU29360
BSU29400	BSU29370
BSU29400	BSU29380
BSU29400	BSU29390
BSU29740	BSU03040
BSU29740	BSU04470
BSU29740	BSU05830
BSU29740	BSU07610
BSU29740	BSU07620
BSU29740	BSU07800
BSU29740	BSU07810
BSU29740	BSU07820
BSU29740	BSU08060
BSU29740	BSU08070
BSU29740	BSU08080
BSU29740	BSU08090
BSU29740	BSU08100
BSU29740	BSU08110
BSU29740	BSU08180
BSU29740	BSU08190
BSU29740	BSU08200
BSU29740	BSU09280
BSU29740	BSU09290
BSU29740	BSU12300
BSU29740	BSU12310
BSU29740	BSU12320
BSU29740	BSU12330
BSU29740	BSU12340
BSU29740	BSU12350
BSU29740	BSU12360
BSU29740	BSU12370
BSU29740	BSU12380
BSU29740	BSU12390
BSU29740	BSU14140
BSU29740	BSU17570
BSU29740	BSU17580
BSU29740	BSU17600
BSU29740	BSU17610
BSU29740	BSU19030
BSU29740	BSU22090
BSU29740	BSU22100
BSU29740	BSU24120
BSU29740	BSU24130
BSU29740	BSU24140
BSU29740	BSU24150
BSU29740	BSU24160
BSU29740	BSU24170
BSU29740	BSU27030
BSU29740	BSU27040
BSU29740	BSU27050
BSU29740	BSU27060
BSU29740	BSU27070
BSU29740	BSU28250
BSU29740	BSU28260
BSU29740	BSU28270
BSU29740	BSU28280
BSU29740	BSU28290
BSU29740	BSU28300
BSU29740	BSU28310
BSU29740	BSU28520
BSU29740	BSU28530
BSU29740	BSU28540
BSU29740	BSU28550
BSU29740	BSU28560
BSU29740	BSU28720
BSU29740	BSU28730
BSU29740	BSU28740
BSU29740	BSU28750
BSU29740	BSU28760
BSU29740	BSU28770
BSU29740	BSU28780
BSU29740	BSU28790
BSU29740	BSU28800
BSU29740	BSU29100
BSU29740	BSU29110
BSU29740	BSU29120
BSU29740	BSU29130
BSU29740	BSU29140
BSU29740	BSU29470
BSU29740	BSU29680
BSU29740	BSU29690
BSU29740	BSU29700
BSU29740	BSU29710
BSU29740	BSU33960
BSU29740	BSU35910
BSU29740	BSU35920
BSU29740	BSU35930
BSU29740	BSU35940
BSU29740	BSU35950
BSU29740	BSU35960
BSU29740	BSU36000
BSU29740	BSU36010
BSU29740	BSU37660
BSU29740	BSU38190
BSU29740	BSU38560
BSU29740	BSU38570
BSU29740	BSU38580
BSU29740	BSU38590
BSU29740	BSU38730
BSU29740	BSU38740
BSU29740	BSU38750
BSU29740	BSU38760
BSU29740	BSU38770
BSU29740	BSU38810
BSU29740	BSU38970
BSU29740	BSU38980
BSU29740	BSU38990
BSU29740	BSU39000
BSU29740	BSU39070
BSU29740	BSU39250
BSU29740	BSU39260
BSU29740	BSU39270
BSU29740	BSU39340
BSU29740	BSU39350
BSU29740	BSU39360
BSU29740	BSU39370
BSU29740	BSU39380
BSU29740	BSU39390
BSU29740	BSU39400
BSU29740	BSU39410
BSU29740	BSU39420
BSU29740	BSU39670
BSU29740	BSU39680
BSU29740	BSU39690
BSU29740	BSU39700
BSU29740	BSU39710
BSU29740	BSU39720
BSU29740	BSU39730
BSU29740	BSU39740
BSU29740	BSU39750
BSU29740	BSU39760
BSU29740	BSU40050
BSU29740	BSU40060
BSU29740	BSU40070
BSU29740	BSU40080
BSU30460	BSU30410
BSU30460	BSU30420
BSU30460	BSU30430
BSU30460	BSU30440
BSU30460	BSU30450
BSU30460	BSU30460
BSU31530	BSU07570
BSU31530	BSU31580
BSU31530	BSU37040
BSU31530	BSU37050
BSU31680	BSU03480
BSU31680	BSU03490
BSU31680	BSU03500
BSU31680	BSU03510
BSU31680	BSU03520
BSU31680	BSU03770
BSU31680	BSU03780
BSU31680	BSU07560
BSU31680	BSU12430
BSU31680	BSU12440
BSU31680	BSU25830
BSU31680	BSU25840
BSU31680	BSU31720
BSU31680	BSU37460
BSU31680	BSU37470
BSU32140	BSU14700
BSU32150	BSU14700
BSU32420	BSU13170
BSU32420	BSU32410
BSU32420	BSU32430
BSU32420	BSU32440
BSU32420	BSU32450
BSU32420	BSU32460
BSU32420	BSU32470
BSU32420	BSU32480
BSU32420	BSU32490
BSU32420	BSU32500
BSU32420	BSU32510
BSU32420	BSU32520
BSU32420	BSU32530
BSU32420	BSU36470
BSU32420	BSU36640
BSU32420	BSU36650
BSU32420	BSU36660
BSU33010	BSU12900
BSU33010	BSU33000
BSU33010	BSU33010
BSU33010	BSU33020
BSU33220	BSU10770
BSU33220	BSU21440
BSU33220	BSU21450
BSU33220	BSU21460
BSU33220	BSU21470
BSU33220	BSU21480
BSU33220	BSU23090
BSU33220	BSU33220
BSU33220	BSU33230
BSU33220	BSU35620
BSU33220	BSU35630
BSU33220	BSU35640
BSU33220	BSU39220
BSU33220	BSU39230
BSU33660	BSU06830
BSU33660	BSU33640
BSU33660	BSU36380
BSU33660	BSU40300
BSU33660	BSU40310
BSU33790	BSU32820
BSU33790	BSU32830
BSU33790	BSU32840
BSU33790	BSU33780
BSU33790	BSU33790
BSU33950	BSU33900
BSU33950	BSU33910
BSU33950	BSU33920
BSU33950	BSU33930
BSU33950	BSU33940
BSU33950	BSU33950
BSU33970	BSU28510
BSU33970	BSU28720
BSU33970	BSU28730
BSU33970	BSU28740
BSU33970	BSU28750
BSU33970	BSU28760
BSU33970	BSU28770
BSU33970	BSU28780
BSU33970	BSU28790
BSU33970	BSU28800
BSU33970	BSU28810
BSU33970	BSU33960
BSU33970	BSU33970
BSU34170	BSU34120
BSU34170	BSU34130
BSU35490	BSU03040
BSU35490	BSU10300
BSU35490	BSU10420
BSU35490	BSU14410
BSU35490	BSU14700
BSU35490	BSU23310
BSU35490	BSU24280
BSU35490	BSU31720
BSU35490	BSU34450
BSU35490	BSU34460
BSU35490	BSU34470
BSU35490	BSU38410
BSU35490	BSU38420
BSU35490	BSU38930
BSU35490	BSU38940
BSU35490	BSU39070
BSU35490	BSU39220
BSU35490	BSU39230
BSU35650	BSU35620
BSU35650	BSU35630
BSU35650	BSU35640
BSU35650	BSU35650
BSU36020	BSU03050
BSU36020	BSU03060
BSU36020	BSU36000
BSU36020	BSU36010
BSU36420	BSU00230
BSU36420	BSU00600
BSU36420	BSU00610
BSU36420	BSU00620
BSU36420	BSU00630
BSU36420	BSU01570
BSU36420	BSU03090
BSU36420	BSU03100
BSU36420	BSU06300
BSU36420	BSU06890
BSU36420	BSU06900
BSU36420	BSU06910
BSU36420	BSU06920
BSU36420	BSU06930
BSU36420	BSU10790
BSU36420	BSU10960
BSU36420	BSU11760
BSU36420	BSU12090
BSU36420	BSU13830
BSU36420	BSU13840
BSU36420	BSU15030
BSU36420	BSU15170
BSU36420	BSU15210
BSU36420	BSU15220
BSU36420	BSU15230
BSU36420	BSU15240
BSU36420	BSU15250
BSU36420	BSU15260
BSU36420	BSU15270
BSU36420	BSU15810
BSU36420	BSU17420
BSU36420	BSU17700
BSU36420	BSU22200
BSU36420	BSU22520
BSU36420	BSU22800
BSU36420	BSU24360
BSU36420	BSU24370
BSU36420	BSU24380
BSU36420	BSU24390
BSU36420	BSU24400
BSU36420	BSU24410
BSU36420	BSU24420
BSU36420	BSU24430
BSU36420	BSU25060
BSU36420	BSU25070
BSU36420	BSU25350
BSU36420	BSU25360
BSU36420	BSU25770
BSU36420	BSU26390
BSU36420	BSU27670
BSU36420	BSU27970
BSU36420	BSU27980
BSU36420	BSU28380
BSU36420	BSU28410
BSU36420	BSU36750
BSU36420	BSU40530
BSU36600	BSU05450
BSU36600	BSU24010
BSU36600	BSU24020
BSU36600	BSU26590
BSU36600	BSU26600
BSU36600	BSU36600
BSU37080	BSU22600
BSU37080	BSU22610
BSU37080	BSU22620
BSU37080	BSU22630
BSU37080	BSU22640
BSU37080	BSU22650
BSU37080	BSU22660
BSU37080	BSU22670
BSU37080	BSU22680
BSU37290	BSU03050
BSU37290	BSU03060
BSU37290	BSU03280
BSU37290	BSU03290
BSU37290	BSU03300
BSU37290	BSU09840
BSU37290	BSU13040
BSU37290	BSU25430
BSU37290	BSU25440
BSU37290	BSU25450
BSU37290	BSU25460
BSU37290	BSU25470
BSU37290	BSU25480
BSU37290	BSU25490
BSU37290	BSU25500
BSU37290	BSU36000
BSU37290	BSU36010
BSU37290	BSU37290
BSU37310	BSU09840
BSU37310	BSU37250
BSU37310	BSU37260
BSU37310	BSU37270
BSU37310	BSU37280
BSU37310	BSU37290
BSU37310	BSU37310
BSU37310	BSU37320
BSU37620	BSU08660
BSU37620	BSU25540
BSU37620	BSU36970
BSU37620	BSU37620
BSU37620	BSU38630
BSU37650	BSU33430
BSU37650	BSU33440
BSU37650	BSU37650
BSU38070	BSU34450
BSU38070	BSU34460
BSU38070	BSU34470
BSU38070	BSU38030
BSU38070	BSU38040
BSU38070	BSU38050
BSU38070	BSU38410
BSU38070	BSU38420
BSU38420	BSU34450
BSU38420	BSU34460
BSU38420	BSU34470
BSU38420	BSU38030
BSU38420	BSU38040
BSU38420	BSU38050
BSU38420	BSU38410
BSU38420	BSU38420
BSU38600	BSU38560
BSU38600	BSU38570
BSU38600	BSU38580
BSU38600	BSU38590
BSU39080	BSU39070
BSU39080	BSU39250
BSU39080	BSU39260
BSU39080	BSU39270
BSU39340	BSU39350
BSU39340	BSU39360
BSU39340	BSU39370
BSU39340	BSU39380
BSU39340	BSU39390
BSU39430	BSU39400
BSU39430	BSU39410
BSU39430	BSU39420
BSU39770	BSU06230
BSU39770	BSU39670
BSU39770	BSU39680
BSU39770	BSU39690
BSU39770	BSU39700
BSU39770	BSU39710
BSU39770	BSU39720
BSU39770	BSU39730
BSU39770	BSU39740
BSU39770	BSU39750
BSU39770	BSU39760
BSU39770	BSU39770
BSU39770	BSU39780
BSU40050	BSU40050
BSU40050	BSU40060
BSU40050	BSU40070
BSU40050	BSU40080
BSU40350	BSU37760
BSU40350	BSU37770
BSU40350	BSU37780
BSU40350	BSU37790
BSU40350	BSU40320
BSU40350	BSU40330
BSU40350	BSU40340
BSU40350	BSU40350
BSU40410	BSU13820
BSU40410	BSU15280
BSU40410	BSU15290
BSU40410	BSU19210
BSU40410	BSU35720
BSU40410	BSU35730
BSU40410	BSU35740
BSU40870	BSU17600
BSU40870	BSU17610
BSU40870	BSU40050
BSU40870	BSU40060
BSU40870	BSU40070
BSU40870	BSU40080

## Sheet: Table S9
Table S9: Regulatory interactions in transcriptional regulatory network (TRN) of E. coli with s-factors.
Source	Target
b0020	b0019
b0020	b0020
b0020	b1021
b0020	b1022
b0020	b1023
b0020	b1024
b0020	b1482
b0034	b0035
b0034	b0036
b0034	b0037
b0034	b0038
b0034	b0039
b0034	b0040
b0034	b0041
b0034	b0042
b0034	b0043
b0034	b0044
b0064	b0061
b0064	b0062
b0064	b0063
b0064	b0064
b0064	b0396
b0064	b1900
b0064	b1901
b0064	b2841
b0064	b3564
b0064	b3565
b0064	b4460
b0069	b0066
b0069	b0067
b0069	b0068
b0069	b0069
b0069	b0070
b0069	b2379
b0069	b4662
b0076	b0071
b0076	b0072
b0076	b0073
b0076	b0074
b0076	b0075
b0076	b0076
b0076	b2754
b0076	b2755
b0076	b2756
b0076	b2757
b0076	b2758
b0076	b2759
b0076	b2760
b0076	b3721
b0076	b3722
b0076	b3723
b0076	b4133
b0076	b4365
b0076	b4366
b0080	b0070
b0080	b0112
b0080	b0113
b0080	b0114
b0080	b0115
b0080	b0116
b0080	b0118
b0080	b0311
b0080	b0312
b0080	b0313
b0080	b0314
b0080	b0315
b0080	b0331
b0080	b0333
b0080	b0334
b0080	b0335
b0080	b0428
b0080	b0429
b0080	b0430
b0080	b0431
b0080	b0432
b0080	b0733
b0080	b0734
b0080	b0871
b0080	b1037
b0080	b1038
b0080	b1039
b0080	b1040
b0080	b1136
b0080	b1241
b0080	b1276
b0080	b1530
b0080	b1531
b0080	b1532
b0080	b1676
b0080	b1702
b0080	b1779
b0080	b1780
b0080	b1817
b0080	b1819
b0080	b1850
b0080	b1851
b0080	b1852
b0080	b2097
b0080	b2167
b0080	b2168
b0080	b2169
b0080	b2388
b0080	b2415
b0080	b2416
b0080	b2417
b0080	b2712
b0080	b2779
b0080	b2829
b0080	b2925
b0080	b2926
b0080	b2927
b0080	b2980
b0080	b3365
b0080	b3366
b0080	b3367
b0080	b3368
b0080	b3403
b0080	b3599
b0080	b3600
b0080	b3601
b0080	b3612
b0080	b3613
b0080	b3614
b0080	b3916
b0080	b3919
b0080	b3956
b0080	b4014
b0080	b4015
b0080	b4016
b0080	b4233
b0080	b4662
b0113	b0081
b0113	b0082
b0113	b0083
b0113	b0084
b0113	b0085
b0113	b0086
b0113	b0087
b0113	b0088
b0113	b0089
b0113	b0090
b0113	b0091
b0113	b0092
b0113	b0093
b0113	b0094
b0113	b0095
b0113	b0096
b0113	b0113
b0113	b0114
b0113	b0115
b0113	b0116
b0113	b0154
b0113	b0428
b0113	b0429
b0113	b0430
b0113	b0431
b0113	b0432
b0113	b0460
b0113	b0461
b0113	b0628
b0113	b1109
b0113	b2579
b0113	b2975
b0113	b2976
b0113	b2977
b0113	b2979
b0113	b4287
b0113	b4288
b0113	b4289
b0113	b4290
b0113	b4291
b0113	b4467
b0113	b4468
b0162	b0162
b0162	b2787
b0162	b2788
b0162	b2789
b0162	b3124
b0162	b3125
b0162	b3126
b0162	b3127
b0162	b3128
b0226	b0225
b0226	b0226
b0226	b0623
b0294	b0293
b0294	b0294
b0294	b1891
b0294	b1892
b0294	b1920
b0294	b1921
b0294	b1922
b0294	b1923
b0313	b0311
b0313	b0312
b0313	b0313
b0313	b0314
b0330	b0330
b0330	b0331
b0330	b0333
b0330	b0334
b0330	b0335
b0338	b0338
b0338	b0339
b0338	b0340
b0338	b0341
b0345	b0342
b0345	b0343
b0345	b0344
b0346	b0347
b0346	b0348
b0346	b0349
b0346	b0350
b0346	b0351
b0346	b0352
b0399	b0080
b0399	b0241
b0399	b0330
b0399	b0383
b0399	b0384
b0399	b0397
b0399	b0398
b0399	b0399
b0399	b0400
b0399	b0570
b0399	b0571
b0399	b0572
b0399	b0573
b0399	b0574
b0399	b0575
b0399	b0929
b0399	b1020
b0399	b1129
b0399	b1384
b0399	b1540
b0399	b1597
b0399	b1782
b0399	b1850
b0399	b1970
b0399	b1982
b0399	b2063
b0399	b2465
b0399	b2916
b0399	b2987
b0399	b3449
b0399	b3450
b0399	b3451
b0399	b3452
b0399	b3453
b0399	b3515
b0399	b3516
b0399	b3521
b0399	b3615
b0399	b3724
b0399	b3725
b0399	b3726
b0399	b3727
b0399	b3728
b0399	b4030
b0399	b4092
b0399	b4093
b0399	b4094
b0399	b4095
b0399	b4096
b0399	b4097
b0399	b4098
b0399	b4099
b0399	b4100
b0399	b4101
b0399	b4102
b0399	b4105
b0399	b4106
b0399	b4115
b0413	b2234
b0413	b2235
b0413	b2236
b0413	b2673
b0413	b2674
b0413	b2675
b0413	b2676
b0413	b4237
b0413	b4238
b0435	b0839
b0435	b4150
b0440	b0687
b0440	b0688
b0440	b0756
b0440	b0757
b0440	b0758
b0440	b0759
b0440	b1907
b0440	b3161
b0464	b0462
b0464	b0463
b0464	b0464
b0487	b0123
b0487	b0484
b0487	b0781
b0487	b0782
b0487	b0783
b0487	b0784
b0487	b0785
b0504	b0515
b0504	b0516
b0504	b0517
b0506	b0504
b0506	b0505
b0506	b0507
b0506	b0508
b0506	b0509
b0506	b0511
b0506	b0512
b0506	b0513
b0506	b0514
b0564	b0972
b0564	b0973
b0564	b0974
b0564	b0975
b0564	b0976
b0564	b0977
b0564	b0978
b0564	b0979
b0564	b0980
b0564	b4592
b0566	b0929
b0566	b2215
b0571	b0570
b0571	b0571
b0571	b0572
b0571	b0573
b0571	b0574
b0571	b0575
b0620	b0564
b0620	b0613
b0620	b0614
b0620	b0615
b0620	b0616
b0620	b0617
b0620	b0618
b0620	b0619
b0620	b0620
b0620	b3093
b0620	b3236
b0676	b0675
b0676	b0676
b0676	b0677
b0676	b0678
b0676	b0679
b0676	b0681
b0676	b0682
b0676	b1061
b0676	b1498
b0676	b1501
b0676	b1733
b0676	b1734
b0676	b1735
b0676	b1736
b0676	b1737
b0676	b1738
b0676	b1817
b0676	b1819
b0676	b2415
b0676	b2416
b0676	b2417
b0676	b2829
b0676	b2943
b0676	b3408
b0676	b3409
b0676	b3410
b0676	b3729
b0676	b3730
b0676	b4310
b0676	b4311
b0676	b4312
b0676	b4397
b0676	b4398
b0676	b4399
b0676	b4400
b0683	b0116
b0683	b0150
b0683	b0151
b0683	b0152
b0683	b0153
b0683	b0167
b0683	b0428
b0683	b0429
b0683	b0430
b0683	b0431
b0683	b0432
b0683	b0450
b0683	b0451
b0683	b0583
b0683	b0584
b0683	b0585
b0683	b0586
b0683	b0587
b0683	b0588
b0683	b0589
b0683	b0590
b0683	b0591
b0683	b0592
b0683	b0593
b0683	b0594
b0683	b0595
b0683	b0596
b0683	b0597
b0683	b0683
b0683	b0721
b0683	b0722
b0683	b0723
b0683	b0724
b0683	b0726
b0683	b0727
b0683	b0728
b0683	b0729
b0683	b0755
b0683	b0805
b0683	b0928
b0683	b0929
b0683	b1062
b0683	b1102
b0683	b1109
b0683	b1243
b0683	b1244
b0683	b1245
b0683	b1246
b0683	b1247
b0683	b1252
b0683	b1334
b0683	b1546
b0683	b1547
b0683	b1548
b0683	b1611
b0683	b1658
b0683	b1679
b0683	b1680
b0683	b1682
b0683	b1683
b0683	b1684
b0683	b1732
b0683	b1761
b0683	b1821
b0683	b1852
b0683	b1891
b0683	b1892
b0683	b1905
b0683	b1973
b0683	b1988
b0683	b2029
b0683	b2106
b0683	b2107
b0683	b2155
b0683	b2392
b0683	b2552
b0683	b2579
b0683	b2671
b0683	b2673
b0683	b2674
b0683	b2675
b0683	b2676
b0683	b2741
b0683	b2864
b0683	b3005
b0683	b3006
b0683	b3070
b0683	b3124
b0683	b3125
b0683	b3126
b0683	b3127
b0683	b3212
b0683	b3213
b0683	b3214
b0683	b3324
b0683	b3325
b0683	b3326
b0683	b3327
b0683	b3328
b0683	b3329
b0683	b3330
b0683	b3331
b0683	b3332
b0683	b3333
b0683	b3334
b0683	b3335
b0683	b3408
b0683	b3409
b0683	b3410
b0683	b3441
b0683	b3908
b0683	b3938
b0683	b3942
b0683	b4019
b0683	b4062
b0683	b4063
b0683	b4122
b0683	b4287
b0683	b4288
b0683	b4289
b0683	b4290
b0683	b4291
b0683	b4292
b0683	b4293
b0683	b4367
b0683	b4511
b0683	b4567
b0694	b0696
b0694	b0697
b0694	b0698
b0694	b4513
b0730	b0730
b0730	b0731
b0730	b0732
b0761	b0763
b0761	b0764
b0761	b0765
b0761	b0781
b0761	b0782
b0761	b0783
b0761	b0784
b0761	b0785
b0761	b0894
b0761	b0895
b0761	b0896
b0761	b1221
b0761	b1222
b0761	b1243
b0761	b1244
b0761	b1245
b0761	b1246
b0761	b1247
b0761	b2194
b0761	b2195
b0761	b2196
b0761	b2197
b0761	b2198
b0761	b2199
b0761	b2200
b0761	b2201
b0761	b2202
b0761	b2203
b0761	b2204
b0761	b2205
b0761	b2206
b0761	b2207
b0761	b2208
b0761	b2717
b0761	b2718
b0761	b2719
b0761	b2720
b0761	b2721
b0761	b2722
b0761	b2723
b0761	b2724
b0761	b2725
b0761	b4381
b0761	b4382
b0761	b4383
b0761	b4384
b0817	b0812
b0817	b1821
b0817	b2392
b0817	b4705
b0840	b0411
b0840	b2964
b0840	b4381
b0840	b4382
b0840	b4383
b0840	b4384
b0846	b0277
b0846	b0958
b0846	b1037
b0846	b1038
b0846	b1039
b0846	b1040
b0846	b1163
b0846	b1536
b0846	b1597
b0889	b0077
b0889	b0078
b0889	b0889
b0889	b0907
b0889	b0908
b0889	b1189
b0889	b1190
b0889	b1241
b0889	b1243
b0889	b1244
b0889	b1245
b0889	b1246
b0889	b1247
b0889	b1482
b0889	b1798
b0889	b1814
b0889	b2156
b0889	b2163
b0889	b2211
b0889	b2215
b0889	b2290
b0889	b2659
b0889	b2660
b0889	b2661
b0889	b2662
b0889	b2663
b0889	b2669
b0889	b2903
b0889	b2904
b0889	b2905
b0889	b2913
b0889	b2923
b0889	b3212
b0889	b3213
b0889	b3214
b0889	b3418
b0889	b3454
b0889	b3455
b0889	b3456
b0889	b3457
b0889	b3458
b0889	b3460
b0889	b3508
b0889	b3509
b0889	b3510
b0889	b3572
b0889	b3616
b0889	b3617
b0889	b3766
b0889	b3767
b0889	b3768
b0889	b3769
b0889	b3770
b0889	b3771
b0889	b3772
b0889	b4129
b0889	b4131
b0889	b4132
b0889	b4187
b0889	b4313
b0889	b4314
b0889	b4315
b0889	b4316
b0889	b4317
b0889	b4318
b0889	b4319
b0889	b4320
b0889	b4376
b0889	b4669
b0912	b0032
b0912	b0033
b0912	b0048
b0912	b0124
b0912	b0125
b0912	b0139
b0912	b0140
b0912	b0553
b0912	b0720
b0912	b0726
b0912	b0727
b0912	b0728
b0912	b0729
b0912	b0809
b0912	b0810
b0912	b0811
b0912	b0812
b0912	b0894
b0912	b0895
b0912	b0896
b0912	b0903
b0912	b0904
b0912	b0912
b0912	b0929
b0912	b0933
b0912	b0934
b0912	b0935
b0912	b0936
b0912	b0937
b0912	b1037
b0912	b1038
b0912	b1039
b0912	b1040
b0912	b1109
b0912	b1210
b0912	b1211
b0912	b1212
b0912	b1223
b0912	b1224
b0912	b1225
b0912	b1226
b0912	b1227
b0912	b1304
b0912	b1305
b0912	b1306
b0912	b1307
b0912	b1308
b0912	b1334
b0912	b1387
b0912	b1388
b0912	b1389
b0912	b1390
b0912	b1391
b0912	b1392
b0912	b1393
b0912	b1394
b0912	b1395
b0912	b1396
b0912	b1397
b0912	b1398
b0912	b1480
b0912	b1507
b0912	b1508
b0912	b1656
b0912	b1679
b0912	b1680
b0912	b1682
b0912	b1683
b0912	b1684
b0912	b1712
b0912	b1739
b0912	b1891
b0912	b1892
b0912	b1907
b0912	b2163
b0912	b2215
b0912	b2221
b0912	b2222
b0912	b2223
b0912	b2224
b0912	b2239
b0912	b2240
b0912	b2276
b0912	b2277
b0912	b2278
b0912	b2279
b0912	b2280
b0912	b2281
b0912	b2282
b0912	b2283
b0912	b2284
b0912	b2285
b0912	b2286
b0912	b2287
b0912	b2288
b0912	b2435
b0912	b2436
b0912	b2710
b0912	b2711
b0912	b2717
b0912	b2718
b0912	b2719
b0912	b2720
b0912	b2721
b0912	b2722
b0912	b2723
b0912	b2724
b0912	b2725
b0912	b2726
b0912	b2727
b0912	b2728
b0912	b2729
b0912	b2730
b0912	b2731
b0912	b2762
b0912	b2763
b0912	b2764
b0912	b2864
b0912	b2975
b0912	b2976
b0912	b2977
b0912	b2979
b0912	b3073
b0912	b3113
b0912	b3114
b0912	b3115
b0912	b3116
b0912	b3117
b0912	b3118
b0912	b3161
b0912	b3212
b0912	b3213
b0912	b3214
b0912	b3227
b0912	b3260
b0912	b3261
b0912	b3365
b0912	b3366
b0912	b3367
b0912	b3368
b0912	b3404
b0912	b3405
b0912	b3421
b0912	b3461
b0912	b3494
b0912	b3495
b0912	b3540
b0912	b3541
b0912	b3542
b0912	b3543
b0912	b3544
b0912	b3574
b0912	b3575
b0912	b3576
b0912	b3577
b0912	b3578
b0912	b3579
b0912	b3580
b0912	b3581
b0912	b3582
b0912	b3583
b0912	b3686
b0912	b3724
b0912	b3725
b0912	b3726
b0912	b3727
b0912	b3728
b0912	b3766
b0912	b3767
b0912	b3768
b0912	b3769
b0912	b3770
b0912	b3771
b0912	b3772
b0912	b3908
b0912	b4014
b0912	b4015
b0912	b4016
b0912	b4026
b0912	b4027
b0912	b4028
b0912	b4029
b0912	b4039
b0912	b4040
b0912	b4050
b0912	b4067
b0912	b4068
b0912	b4069
b0912	b4070
b0912	b4071
b0912	b4072
b0912	b4073
b0912	b4074
b0912	b4075
b0912	b4076
b0912	b4117
b0912	b4192
b0912	b4193
b0912	b4194
b0912	b4195
b0912	b4196
b0912	b4197
b0912	b4198
b0912	b4312
b0912	b4314
b0912	b4315
b0912	b4316
b0912	b4317
b0912	b4318
b0912	b4319
b0912	b4320
b0912	b4376
b0912	b4467
b0912	b4468
b0912	b4471
b0912	b4475
b0912	b4669
b0995	b0995
b0995	b0996
b0995	b0997
b0995	b0998
b0995	b3508
b0995	b3509
b0995	b3510
b0995	b3516
b0995	b3517
b0995	b3707
b0995	b3708
b0995	b3709
b1013	b0032
b1013	b0033
b1013	b0592
b1013	b1006
b1013	b1007
b1013	b1008
b1013	b1009
b1013	b1010
b1013	b1011
b1013	b1012
b1013	b1013
b1013	b1285
b1013	b1649
b1013	b1650
b1013	b1651
b1013	b3515
b1013	b3516
b1014	b1014
b1014	b1015
b1040	b0237
b1040	b0382
b1040	b0385
b1040	b0964
b1040	b1003
b1040	b1004
b1040	b1037
b1040	b1038
b1040	b1039
b1040	b1040
b1040	b1041
b1040	b1042
b1040	b1043
b1040	b1937
b1040	b1938
b1040	b1939
b1040	b1940
b1040	b1941
b1040	b1942
b1040	b1943
b1040	b3156
b1040	b3157
b1040	b3661
b1111	b1112
b1130	b0154
b1130	b0462
b1130	b0463
b1130	b0557
b1130	b0565
b1130	b0622
b1130	b0677
b1130	b0841
b1130	b1006
b1130	b1007
b1130	b1008
b1130	b1009
b1130	b1010
b1130	b1011
b1130	b1012
b1130	b1129
b1130	b1130
b1130	b1160
b1130	b1275
b1130	b1499
b1130	b1500
b1130	b1501
b1130	b1608
b1130	b1609
b1130	b1641
b1130	b1826
b1130	b2344
b1130	b3035
b1130	b3036
b1130	b3037
b1130	b3038
b1130	b3207
b1130	b3227
b1130	b3359
b1130	b3428
b1130	b3429
b1130	b3430
b1130	b3431
b1130	b3432
b1130	b3508
b1130	b3509
b1130	b3510
b1130	b3511
b1130	b3512
b1130	b3515
b1130	b3571
b1130	b3939
b1130	b3940
b1130	b4005
b1130	b4006
b1130	b4241
b1130	b4242
b1130	b4599
b1130	b4702
b1162	b1164
b1162	b1165
b1162	b1166
b1162	b1167
b1187	b0221
b1187	b0443
b1187	b0954
b1187	b1187
b1187	b1805
b1187	b2323
b1187	b2341
b1187	b2342
b1187	b2344
b1187	b3081
b1187	b3495
b1187	b3845
b1187	b3846
b1187	b4018
b1201	b1198
b1201	b1199
b1201	b1200
b1201	b1201
b1221	b0034
b1221	b0613
b1221	b0614
b1221	b0615
b1221	b0616
b1221	b0617
b1221	b0618
b1221	b0619
b1221	b0620
b1221	b0826
b1221	b0827
b1221	b0872
b1221	b0873
b1221	b0886
b1221	b0887
b1221	b0894
b1221	b0895
b1221	b0896
b1221	b0903
b1221	b0904
b1221	b0972
b1221	b0973
b1221	b0974
b1221	b0975
b1221	b0976
b1221	b0977
b1221	b0996
b1221	b0997
b1221	b0998
b1221	b1223
b1221	b1224
b1221	b1225
b1221	b1226
b1221	b1227
b1221	b1241
b1221	b1335
b1221	b1474
b1221	b1475
b1221	b1476
b1221	b1587
b1221	b1588
b1221	b1589
b1221	b1590
b1221	b1591
b1221	b1669
b1221	b1670
b1221	b1671
b1221	b1672
b1221	b1673
b1221	b1674
b1221	b1796
b1221	b1797
b1221	b2194
b1221	b2195
b1221	b2196
b1221	b2197
b1221	b2198
b1221	b2199
b1221	b2200
b1221	b2201
b1221	b2202
b1221	b2203
b1221	b2204
b1221	b2205
b1221	b2206
b1221	b2207
b1221	b2208
b1221	b2276
b1221	b2277
b1221	b2278
b1221	b2279
b1221	b2280
b1221	b2281
b1221	b2282
b1221	b2283
b1221	b2284
b1221	b2285
b1221	b2286
b1221	b2287
b1221	b2288
b1221	b2710
b1221	b2711
b1221	b2990
b1221	b2991
b1221	b2992
b1221	b2993
b1221	b2994
b1221	b2995
b1221	b2996
b1221	b2997
b1221	b3365
b1221	b3366
b1221	b3367
b1221	b3368
b1221	b3476
b1221	b3477
b1221	b3478
b1221	b3479
b1221	b3480
b1221	b3481
b1221	b4039
b1221	b4040
b1221	b4070
b1221	b4071
b1221	b4072
b1221	b4073
b1221	b4074
b1221	b4075
b1221	b4076
b1221	b4079
b1221	b4122
b1221	b4123
b1221	b4124
b1221	b4125
b1221	b4138
b1221	b4139
b1221	b4151
b1221	b4152
b1221	b4153
b1221	b4154
b1221	b4209
b1237	b0019
b1237	b0020
b1237	b0034
b1237	b0035
b1237	b0036
b1237	b0037
b1237	b0038
b1237	b0039
b1237	b0040
b1237	b0076
b1237	b0077
b1237	b0078
b1237	b0161
b1237	b0342
b1237	b0343
b1237	b0344
b1237	b0435
b1237	b0564
b1237	b0585
b1237	b0586
b1237	b0587
b1237	b0733
b1237	b0734
b1237	b0756
b1237	b0757
b1237	b0758
b1237	b0759
b1237	b0812
b1237	b0880
b1237	b0889
b1237	b0921
b1237	b0922
b1237	b0923
b1237	b0924
b1237	b1182
b1237	b1237
b1237	b1257
b1237	b1258
b1237	b1259
b1237	b1482
b1237	b1499
b1237	b1501
b1237	b1597
b1237	b1891
b1237	b1892
b1237	b1905
b1237	b1920
b1237	b1921
b1237	b1922
b1237	b1923
b1237	b1951
b1237	b1967
b1237	b2189
b1237	b2216
b1237	b2217
b1237	b2306
b1237	b2307
b1237	b2308
b1237	b2309
b1237	b2369
b1237	b2370
b1237	b2421
b1237	b2422
b1237	b2423
b1237	b2424
b1237	b2425
b1237	b2535
b1237	b2659
b1237	b2660
b1237	b2661
b1237	b2662
b1237	b2663
b1237	b2669
b1237	b2679
b1237	b2702
b1237	b2703
b1237	b2704
b1237	b2705
b1237	b2706
b1237	b2707
b1237	b2708
b1237	b2754
b1237	b2755
b1237	b2756
b1237	b2757
b1237	b2758
b1237	b2759
b1237	b2760
b1237	b2782
b1237	b2783
b1237	b2784
b1237	b3124
b1237	b3125
b1237	b3126
b1237	b3127
b1237	b3265
b1237	b3266
b1237	b3322
b1237	b3323
b1237	b3324
b1237	b3325
b1237	b3326
b1237	b3327
b1237	b3328
b1237	b3329
b1237	b3330
b1237	b3331
b1237	b3332
b1237	b3333
b1237	b3334
b1237	b3335
b1237	b3338
b1237	b3365
b1237	b3366
b1237	b3367
b1237	b3368
b1237	b3491
b1237	b3506
b1237	b3507
b1237	b3508
b1237	b3509
b1237	b3510
b1237	b3511
b1237	b3512
b1237	b3513
b1237	b3514
b1237	b3515
b1237	b3516
b1237	b3517
b1237	b3545
b1237	b3665
b1237	b3721
b1237	b3722
b1237	b3723
b1237	b4116
b1237	b4117
b1237	b4131
b1237	b4132
b1237	b4133
b1237	b4312
b1237	b4313
b1237	b4314
b1237	b4315
b1237	b4316
b1237	b4317
b1237	b4318
b1237	b4319
b1237	b4320
b1237	b4364
b1237	b4365
b1237	b4366
b1237	b4480
b1237	b4511
b1275	b0365
b1275	b0366
b1275	b0367
b1275	b0368
b1275	b0933
b1275	b0934
b1275	b0935
b1275	b0936
b1275	b0937
b1275	b1275
b1275	b1379
b1275	b1987
b1275	b2414
b1275	b2421
b1275	b2422
b1275	b2423
b1275	b2424
b1275	b2425
b1275	b2750
b1275	b2751
b1275	b2752
b1275	b2762
b1275	b2763
b1275	b2764
b1299	b1296
b1299	b1297
b1299	b1298
b1299	b1299
b1299	b1300
b1299	b1301
b1299	b1302
b1303	b1303
b1303	b1304
b1303	b1305
b1303	b1306
b1303	b1307
b1303	b1308
b1303	b4050
b1323	b0048
b1323	b0112
b1323	b0388
b1323	b0389
b1323	b0390
b1323	b0754
b1323	b1323
b1323	b1907
b1323	b2600
b1323	b2601
b1323	b3161
b1323	b4054
b1328	b1326
b1328	b1327
b1328	b4525
b1328	b4673
b1334	b0034
b1334	b0035
b1334	b0036
b1334	b0037
b1334	b0038
b1334	b0039
b1334	b0040
b1334	b0041
b1334	b0042
b1334	b0043
b1334	b0044
b1334	b0113
b1334	b0114
b1334	b0115
b1334	b0116
b1334	b0167
b1334	b0428
b1334	b0429
b1334	b0430
b1334	b0431
b1334	b0432
b1334	b0450
b1334	b0451
b1334	b0585
b1334	b0586
b1334	b0587
b1334	b0602
b1334	b0613
b1334	b0614
b1334	b0615
b1334	b0616
b1334	b0617
b1334	b0618
b1334	b0619
b1334	b0620
b1334	b0621
b1334	b0721
b1334	b0722
b1334	b0723
b1334	b0724
b1334	b0726
b1334	b0727
b1334	b0728
b1334	b0729
b1334	b0733
b1334	b0734
b1334	b0781
b1334	b0782
b1334	b0783
b1334	b0784
b1334	b0785
b1334	b0814
b1334	b0826
b1334	b0827
b1334	b0872
b1334	b0873
b1334	b0886
b1334	b0887
b1334	b0894
b1334	b0895
b1334	b0896
b1334	b0903
b1334	b0904
b1334	b0928
b1334	b0933
b1334	b0934
b1334	b0935
b1334	b0936
b1334	b0937
b1334	b1109
b1334	b1127
b1334	b1160
b1334	b1182
b1334	b1210
b1334	b1211
b1334	b1212
b1334	b1220
b1334	b1221
b1334	b1222
b1334	b1223
b1334	b1224
b1334	b1225
b1334	b1226
b1334	b1227
b1334	b1241
b1334	b1256
b1334	b1276
b1334	b1296
b1334	b1297
b1334	b1324
b1334	b1334
b1334	b1415
b1334	b1474
b1334	b1475
b1334	b1476
b1334	b1537
b1334	b1587
b1334	b1588
b1334	b1589
b1334	b1590
b1334	b1591
b1334	b1611
b1334	b1612
b1334	b1669
b1334	b1670
b1334	b1671
b1334	b1672
b1334	b1673
b1334	b1674
b1334	b1715
b1334	b1716
b1334	b1761
b1334	b1852
b1334	b1881
b1334	b1882
b1334	b1883
b1334	b1884
b1334	b1885
b1334	b1886
b1334	b1904
b1334	b1988
b1334	b2029
b1334	b2163
b1334	b2194
b1334	b2195
b1334	b2196
b1334	b2197
b1334	b2198
b1334	b2199
b1334	b2200
b1334	b2201
b1334	b2202
b1334	b2203
b1334	b2204
b1334	b2205
b1334	b2206
b1334	b2207
b1334	b2208
b1334	b2239
b1334	b2240
b1334	b2241
b1334	b2242
b1334	b2243
b1334	b2276
b1334	b2277
b1334	b2278
b1334	b2279
b1334	b2280
b1334	b2281
b1334	b2282
b1334	b2283
b1334	b2284
b1334	b2285
b1334	b2286
b1334	b2287
b1334	b2288
b1334	b2296
b1334	b2367
b1334	b2368
b1334	b2481
b1334	b2482
b1334	b2483
b1334	b2484
b1334	b2485
b1334	b2486
b1334	b2487
b1334	b2488
b1334	b2489
b1334	b2490
b1334	b2491
b1334	b2492
b1334	b2497
b1334	b2498
b1334	b2499
b1334	b2500
b1334	b2503
b1334	b2552
b1334	b2579
b1334	b2606
b1334	b2607
b1334	b2608
b1334	b2609
b1334	b2710
b1334	b2711
b1334	b2727
b1334	b2728
b1334	b2729
b1334	b2730
b1334	b2731
b1334	b2732
b1334	b2866
b1334	b2867
b1334	b2868
b1334	b2903
b1334	b2904
b1334	b2905
b1334	b2957
b1334	b3071
b1334	b3072
b1334	b3091
b1334	b3092
b1334	b3113
b1334	b3114
b1334	b3115
b1334	b3116
b1334	b3117
b1334	b3118
b1334	b3124
b1334	b3125
b1334	b3126
b1334	b3127
b1334	b3212
b1334	b3213
b1334	b3214
b1334	b3230
b1334	b3231
b1334	b3265
b1334	b3266
b1334	b3311
b1334	b3312
b1334	b3313
b1334	b3314
b1334	b3315
b1334	b3316
b1334	b3317
b1334	b3318
b1334	b3319
b1334	b3320
b1334	b3321
b1334	b3365
b1334	b3366
b1334	b3367
b1334	b3368
b1334	b3408
b1334	b3409
b1334	b3410
b1334	b3416
b1334	b3417
b1334	b3476
b1334	b3477
b1334	b3478
b1334	b3479
b1334	b3480
b1334	b3481
b1334	b3493
b1334	b3515
b1334	b3516
b1334	b3517
b1334	b3518
b1334	b3531
b1334	b3532
b1334	b3540
b1334	b3541
b1334	b3542
b1334	b3543
b1334	b3544
b1334	b3724
b1334	b3725
b1334	b3726
b1334	b3727
b1334	b3728
b1334	b3830
b1334	b3908
b1334	b3942
b1334	b4039
b1334	b4040
b1334	b4062
b1334	b4063
b1334	b4070
b1334	b4071
b1334	b4072
b1334	b4073
b1334	b4074
b1334	b4075
b1334	b4076
b1334	b4079
b1334	b4122
b1334	b4123
b1334	b4124
b1334	b4125
b1334	b4133
b1334	b4138
b1334	b4139
b1334	b4151
b1334	b4152
b1334	b4153
b1334	b4154
b1334	b4209
b1334	b4237
b1334	b4238
b1334	b4326
b1334	b4401
b1334	b4471
b1334	b4511
b1384	b1385
b1399	b1387
b1399	b1388
b1399	b1389
b1399	b1390
b1399	b1391
b1399	b1392
b1399	b1393
b1399	b1394
b1399	b1395
b1399	b1396
b1399	b1397
b1399	b1398
b1450	b0806
b1450	b1257
b1450	b1258
b1450	b1259
b1499	b1499
b1499	b1500
b1499	b3512
b1499	b3513
b1499	b3514
b1507	b1507
b1507	b1508
b1508	b1507
b1508	b1508
b1512	b1511
b1512	b1512
b1512	b1513
b1512	b1514
b1512	b1515
b1512	b1516
b1512	b1517
b1512	b1518
b1512	b1519
b1530	b1530
b1530	b1531
b1530	b1532
b1531	b0447
b1531	b0462
b1531	b0463
b1531	b0578
b1531	b0762
b1531	b0850
b1531	b0851
b1531	b0852
b1531	b0853
b1531	b0871
b1531	b0950
b1531	b0951
b1531	b1014
b1531	b1276
b1531	b1452
b1531	b1530
b1531	b1531
b1531	b1532
b1531	b1611
b1531	b1852
b1531	b2159
b1531	b2237
b1531	b3035
b1531	b3036
b1531	b3037
b1531	b3038
b1531	b3506
b1531	b3507
b1531	b3508
b1531	b3509
b1531	b3510
b1531	b3624
b1531	b3625
b1531	b3908
b1531	b3924
b1531	b4177
b1531	b4396
b1563	b1562
b1563	b1563
b1563	b1564
b1564	b1562
b1564	b1563
b1564	b1564
b1570	b1567
b1570	b1568
b1570	b1569
b1570	b1575
b1570	b1576
b1570	b1577
b1570	b1578
b1570	b1579
b1594	b1101
b1594	b1593
b1594	b1594
b1594	b1817
b1594	b1819
b1594	b2415
b1594	b2416
b1594	b2417
b1594	b2829
b1594	b3418
b1608	b0929
b1608	b1037
b1608	b1038
b1608	b1039
b1608	b1040
b1608	b1224
b1608	b1225
b1608	b1226
b1608	b1227
b1608	b1597
b1618	b1615
b1618	b1616
b1618	b1617
b1618	b1618
b1620	b1620
b1620	b1621
b1620	b1622
b1642	b1182
b1649	b1649
b1649	b1650
b1649	b1651
b1658	b0032
b1658	b0033
b1658	b0336
b1658	b0337
b1658	b0522
b1658	b0523
b1658	b0945
b1658	b1062
b1658	b1131
b1658	b1132
b1658	b1207
b1658	b1658
b1658	b2311
b1658	b2312
b1658	b2313
b1658	b2476
b1658	b2499
b1658	b2500
b1658	b2507
b1658	b2508
b1658	b2551
b1658	b2553
b1658	b2557
b1658	b2903
b1658	b2904
b1658	b2905
b1658	b2937
b1658	b2938
b1658	b4005
b1658	b4006
b1658	b4177
b1712	b0032
b1712	b0033
b1712	b0048
b1712	b0124
b1712	b0125
b1712	b0139
b1712	b0140
b1712	b0553
b1712	b0720
b1712	b0726
b1712	b0727
b1712	b0728
b1712	b0729
b1712	b0809
b1712	b0810
b1712	b0811
b1712	b0812
b1712	b0894
b1712	b0895
b1712	b0896
b1712	b0903
b1712	b0904
b1712	b0912
b1712	b0929
b1712	b0933
b1712	b0934
b1712	b0935
b1712	b0936
b1712	b0937
b1712	b1037
b1712	b1038
b1712	b1039
b1712	b1040
b1712	b1109
b1712	b1210
b1712	b1211
b1712	b1212
b1712	b1223
b1712	b1224
b1712	b1225
b1712	b1226
b1712	b1227
b1712	b1304
b1712	b1305
b1712	b1306
b1712	b1307
b1712	b1308
b1712	b1334
b1712	b1387
b1712	b1388
b1712	b1389
b1712	b1390
b1712	b1391
b1712	b1392
b1712	b1393
b1712	b1394
b1712	b1395
b1712	b1396
b1712	b1397
b1712	b1398
b1712	b1480
b1712	b1507
b1712	b1508
b1712	b1656
b1712	b1679
b1712	b1680
b1712	b1682
b1712	b1683
b1712	b1684
b1712	b1712
b1712	b1739
b1712	b1891
b1712	b1892
b1712	b1907
b1712	b2163
b1712	b2215
b1712	b2221
b1712	b2222
b1712	b2223
b1712	b2224
b1712	b2239
b1712	b2240
b1712	b2276
b1712	b2277
b1712	b2278
b1712	b2279
b1712	b2280
b1712	b2281
b1712	b2282
b1712	b2283
b1712	b2284
b1712	b2285
b1712	b2286
b1712	b2287
b1712	b2288
b1712	b2435
b1712	b2436
b1712	b2710
b1712	b2711
b1712	b2717
b1712	b2718
b1712	b2719
b1712	b2720
b1712	b2721
b1712	b2722
b1712	b2723
b1712	b2724
b1712	b2725
b1712	b2726
b1712	b2727
b1712	b2728
b1712	b2729
b1712	b2730
b1712	b2731
b1712	b2762
b1712	b2763
b1712	b2764
b1712	b2864
b1712	b2975
b1712	b2976
b1712	b2977
b1712	b2979
b1712	b3073
b1712	b3113
b1712	b3114
b1712	b3115
b1712	b3116
b1712	b3117
b1712	b3118
b1712	b3161
b1712	b3212
b1712	b3213
b1712	b3214
b1712	b3227
b1712	b3260
b1712	b3261
b1712	b3365
b1712	b3366
b1712	b3367
b1712	b3368
b1712	b3404
b1712	b3405
b1712	b3421
b1712	b3461
b1712	b3494
b1712	b3495
b1712	b3540
b1712	b3541
b1712	b3542
b1712	b3543
b1712	b3544
b1712	b3574
b1712	b3575
b1712	b3576
b1712	b3577
b1712	b3578
b1712	b3579
b1712	b3580
b1712	b3581
b1712	b3582
b1712	b3583
b1712	b3686
b1712	b3724
b1712	b3725
b1712	b3726
b1712	b3727
b1712	b3728
b1712	b3766
b1712	b3767
b1712	b3768
b1712	b3769
b1712	b3770
b1712	b3771
b1712	b3772
b1712	b3908
b1712	b4014
b1712	b4015
b1712	b4016
b1712	b4026
b1712	b4027
b1712	b4028
b1712	b4029
b1712	b4039
b1712	b4040
b1712	b4050
b1712	b4067
b1712	b4068
b1712	b4069
b1712	b4070
b1712	b4071
b1712	b4072
b1712	b4073
b1712	b4074
b1712	b4075
b1712	b4076
b1712	b4117
b1712	b4192
b1712	b4193
b1712	b4194
b1712	b4195
b1712	b4196
b1712	b4197
b1712	b4198
b1712	b4312
b1712	b4314
b1712	b4315
b1712	b4316
b1712	b4317
b1712	b4318
b1712	b4319
b1712	b4320
b1712	b4376
b1712	b4467
b1712	b4468
b1712	b4471
b1712	b4475
b1712	b4669
b1735	b1733
b1735	b1734
b1735	b1735
b1735	b1736
b1735	b1737
b1735	b1738
b1827	b1850
b1827	b1851
b1891	b0652
b1891	b0653
b1891	b0654
b1891	b0655
b1891	b1070
b1891	b1071
[truncated: 5,979 more rows]

[truncated: 1 more sheets: Table S10]
